# Supplementary material for: Trifunctional organocatalyst-promoted counterion catalysis for fast and enantioselective aza-Morita–Baylis–Hillman reactions at ambient temperature
Source: Royal Society of Chemistry journal article supplement (doi:10.1039/b901781j), 2009-01-01
Supplement: b901781j.pdf [file b901781j.pdf]

\*\*\*\* Supporting information \*\*\*\*

**Trifunctional Organocatalyst-Promoted Counterion Catalysis for  
Fast and Enantioselective aza-Morita-Baylis-Hillman Reactions at  
Ambient Temperature**

Jean-Marc Garnier, Fei Liu\*

*Department of Chemistry & Biomolecular Sciences, Macquarie University,*

*Sydney, NSW, 2109 Australia*

*\*fliu@alchemist.chem.mq.edu.au*

\*\*\*\*\*

**I- General information-----S2**

**II- Copies of NMR spectra-----S3**

- (S)-2-tert-butyl-6-((2'-(diphenylphosphoryl)-1,1'-binaphthyl-2-ylamino)methyl)phenol  
(**1b'**) (<sup>31</sup>P, <sup>1</sup>H, <sup>13</sup>C)-----S3
- (S)-2-tert-butyl-6-((2'-(diphenylphosphino)-1,1'-binaphthyl-2-ylamino)methyl)phenol  
(**1b**) (<sup>31</sup>P, <sup>1</sup>H, <sup>13</sup>C)-----S4
- (S)-2-((2'-(diphenylphosphoryl)-1,1'-binaphthyl-2-ylamino)methyl)-6-fluorophenol  
(**1c'**) (<sup>31</sup>P, <sup>1</sup>H, <sup>13</sup>C)-----S6
- (S)-2-((2'-(diphenylphosphino)-1,1'-binaphthyl-2-ylamino)methyl)-6-fluorophenol  
(**1c**) (<sup>31</sup>P, <sup>1</sup>H, <sup>13</sup>C)-----S7
- (S)-4-bromo-2-tert-butyl-6-((2'-(diphenylphosphoryl)-1,1'-binaphthyl-2-ylamino)methyl)phenol  
(**1d'**) (<sup>31</sup>P, <sup>1</sup>H, <sup>13</sup>C)-----S9
- (S)-4-bromo-2-tert-butyl-6-((2'-(diphenylphosphino)-1,1'-binaphthyl-2-ylamino)methyl)phenol  
(**1d**) (<sup>31</sup>P, <sup>1</sup>H, <sup>13</sup>C)-----S10

- (*S*)-4-bromo-2-((2'-(diphenylphosphoryl)-1,1'-binaphthyl-2-ylamino)methyl)-6-fluorophenol (**1e'**) (<sup>31</sup>P, <sup>1</sup>H, <sup>13</sup>C)-----S12
- (*S*)-4-bromo-2-((2'-(diphenylphosphino)-1,1'-binaphthyl-2-ylamino)methyl)-6-fluorophenol (**1e**) (<sup>31</sup>P, <sup>1</sup>H, <sup>13</sup>C)-----S13
- (*S*)-2-tert-butyl-6-((2'-(diphenylphosphoryl)-1,1'-binaphthyl-2-ylamino)methyl)-4-nitrophenol (**1f'**) (<sup>31</sup>P, <sup>1</sup>H, <sup>13</sup>C)-----S15
- (*S*)-2-tert-butyl-6-((2'-(diphenylphosphino)-1,1'-binaphthyl-2-ylamino)methyl)-4-nitrophenol (**1f**) (<sup>31</sup>P, <sup>1</sup>H, <sup>13</sup>C)-----S16

### III- NMR data of catalysts 1b-f-----S18

### IV- NMR and HPLC data of MBH adducts 2a-j, 4a-c, 6-----S20

#### I- General information:

Unless otherwise stated, all chemicals and reagents were received from Sigma Aldrich, Castle Hill, NSW, Australia and used without further purification. Reactions were performed under a nitrogen atmosphere. All reactions were magnetically stirred and monitored by thin-layer chromatography (TLC) using silica gel 60 F254 aluminium pre-coated plates from Merck (0.25mm). Flash column chromatography was performed on silica gel (60 Å 0.06-0.2 mm, 400 mesh from Scharlau).

<sup>1</sup>H NMR and <sup>13</sup>C NMR spectra were obtained in dry CDCl<sub>3</sub> on Bruker Avance DPX 400 MHz spectrometer. Chemical shifts were reported in ppm (parts per millions) using chloroform as the internal reference (<sup>1</sup>H, 7.26 ppm, <sup>13</sup>C, 77.5 ppm). All spectra were acquired and processed using Bruker XWinNMR (2.5), Bruker TOPSPIN (1.3) and MestRec 4.9.9.6. Infrared spectra were taken on a Perkin Elmer paragon 1000PC FTIR spectrometer. Optical rotations were measured at 23°C on a P1010 digital polarimeter (Jasco, Japan). High resolution mass analysis was provided by Macquarie University and by University of Illinois, US.

## II- Copies of NMR spectra:

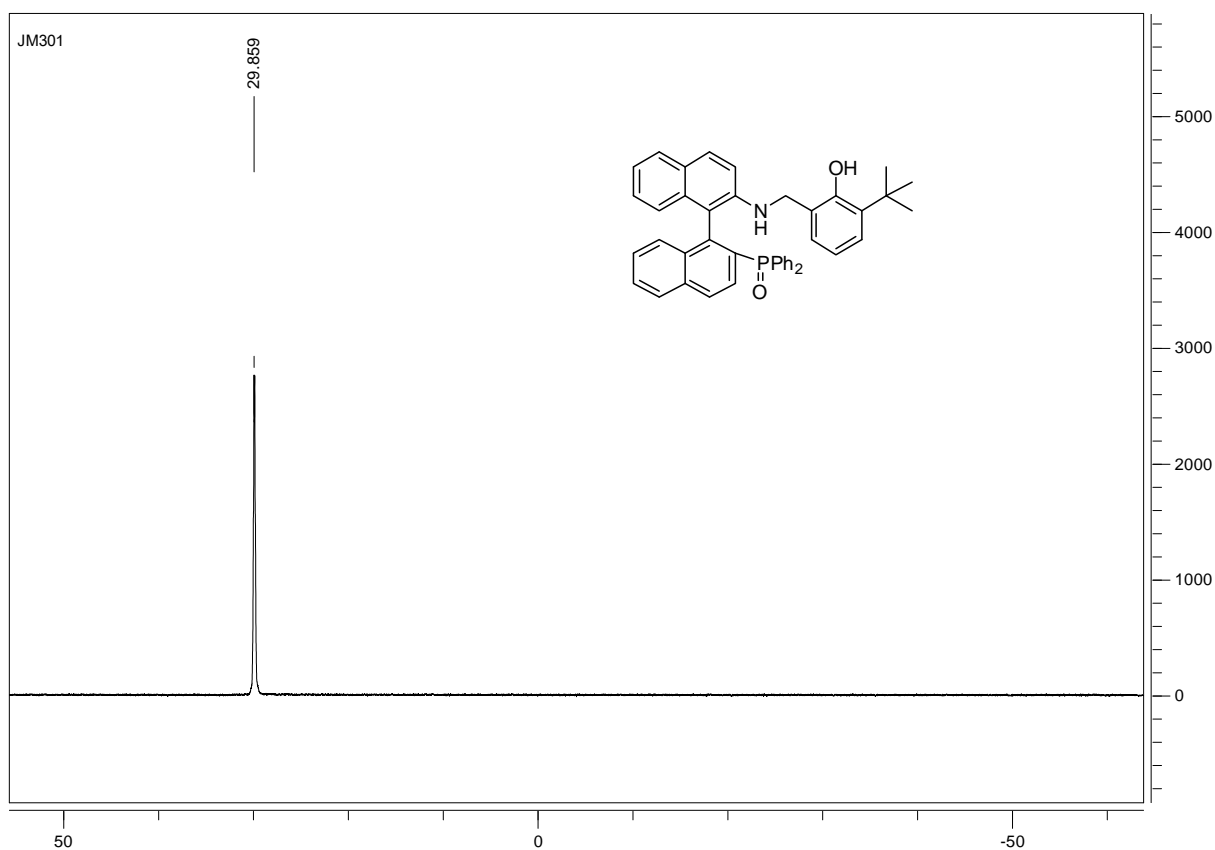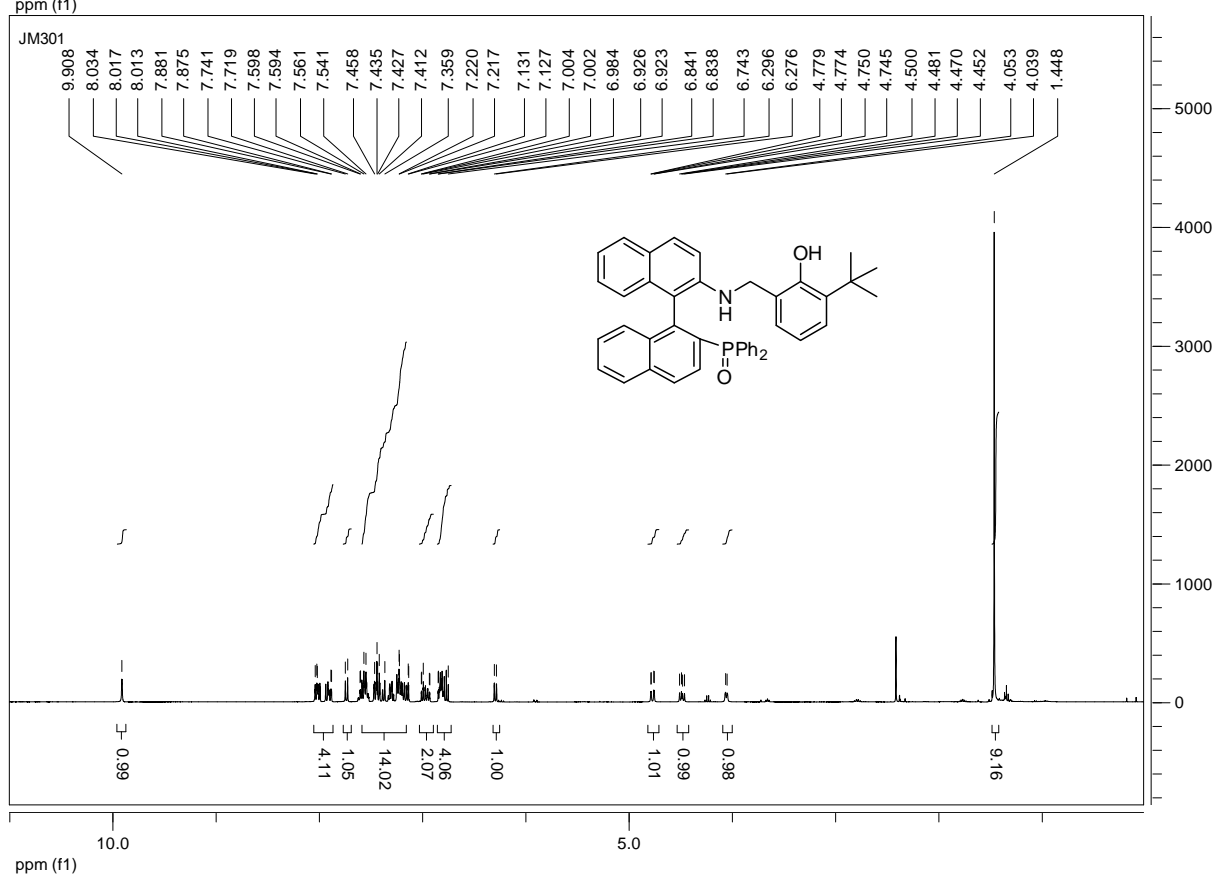

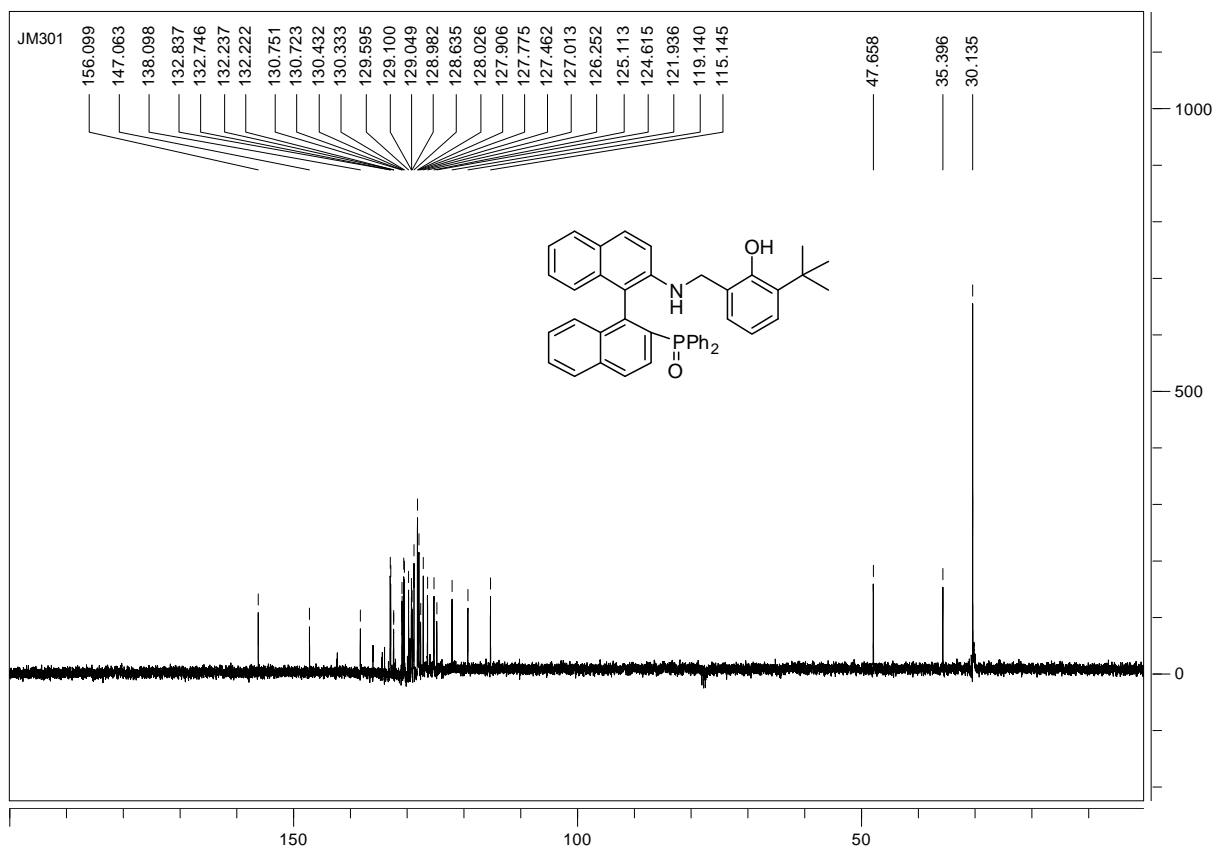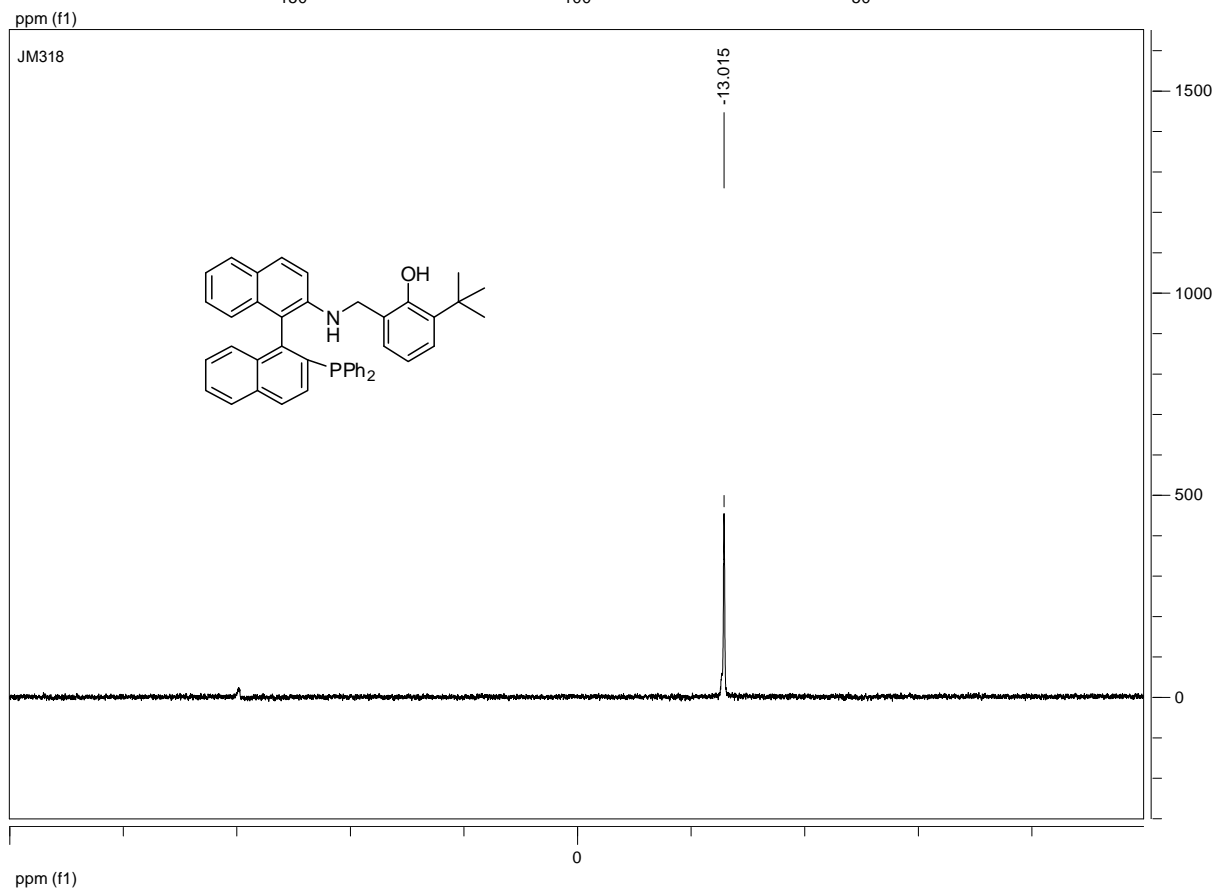

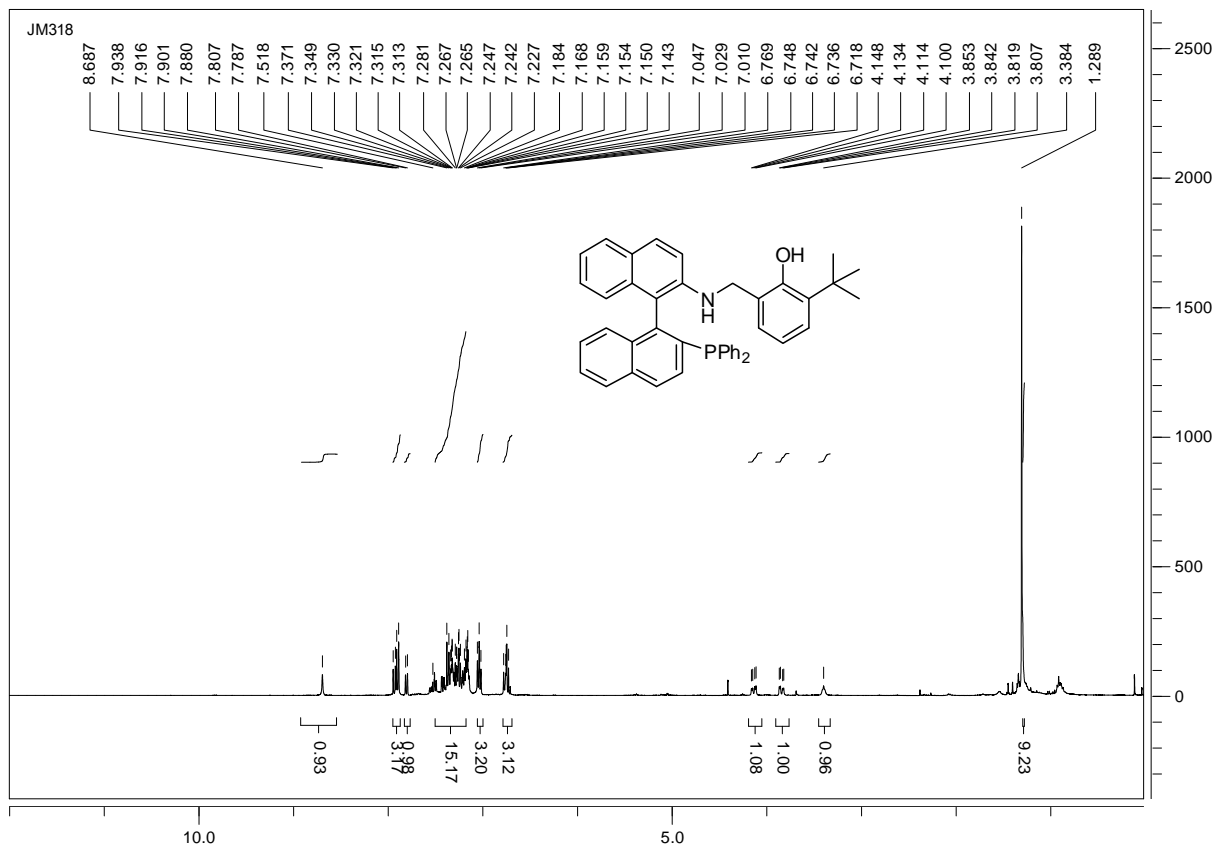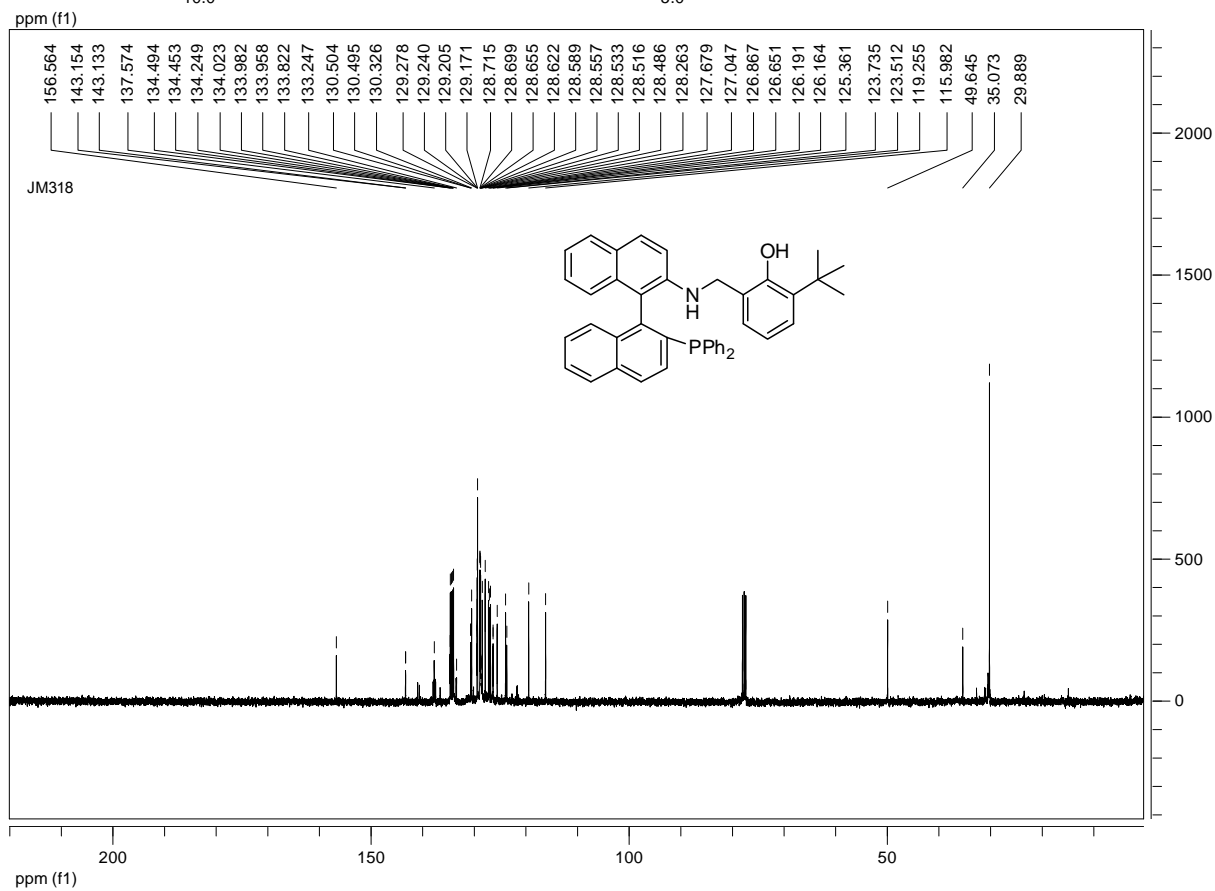

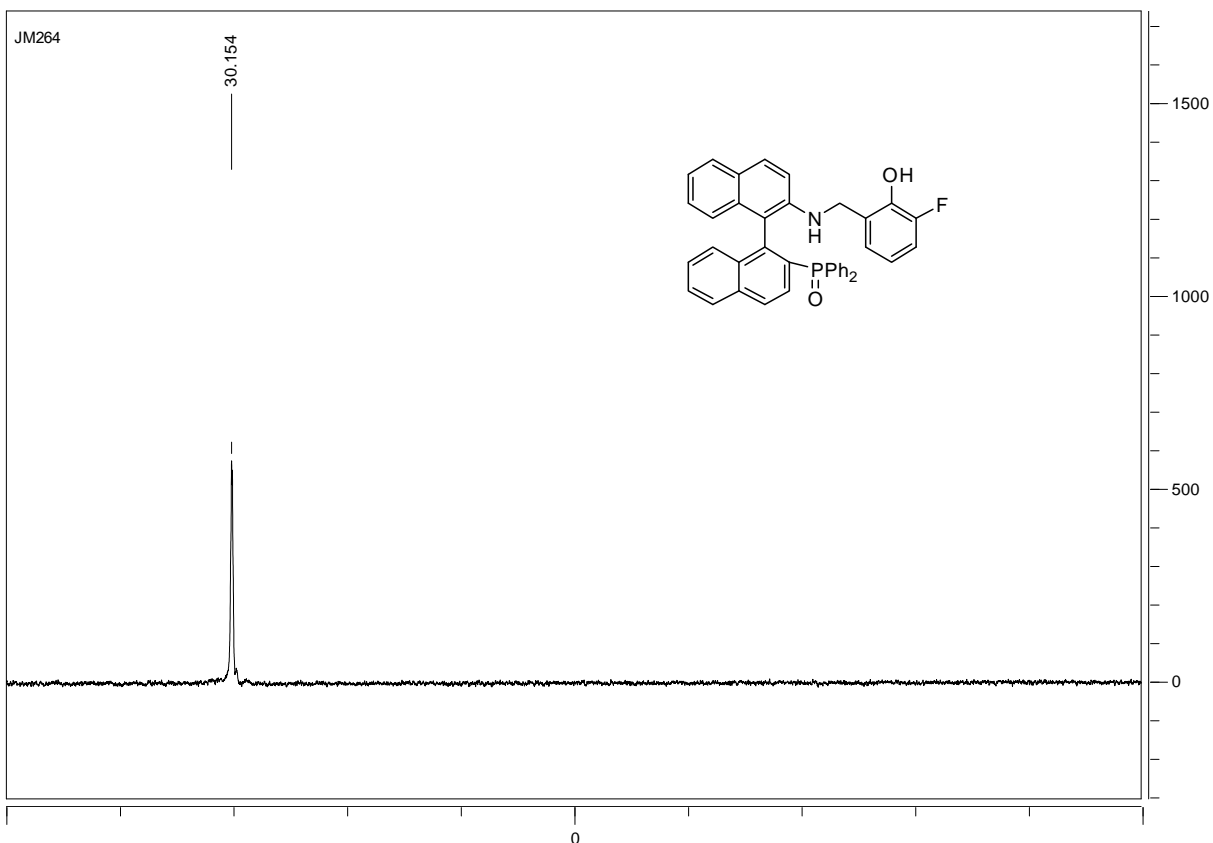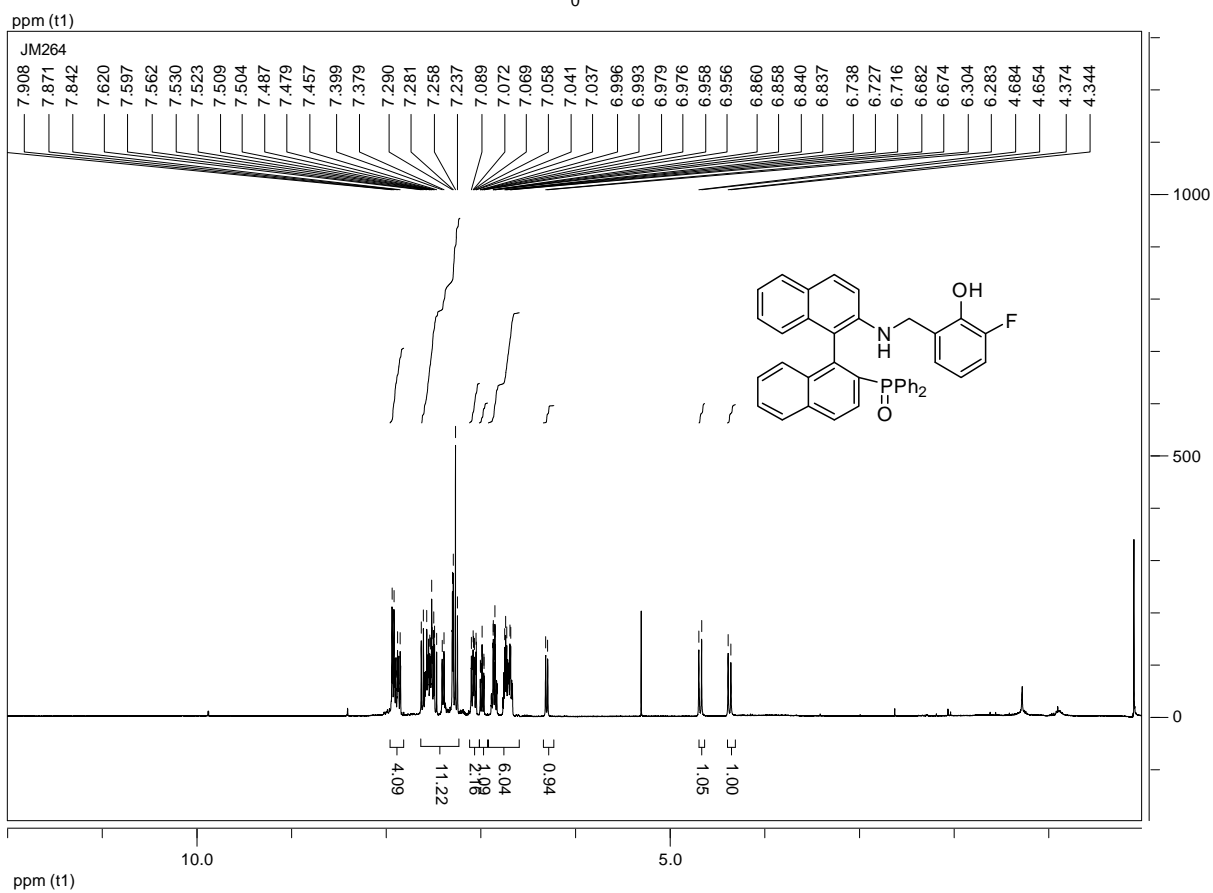

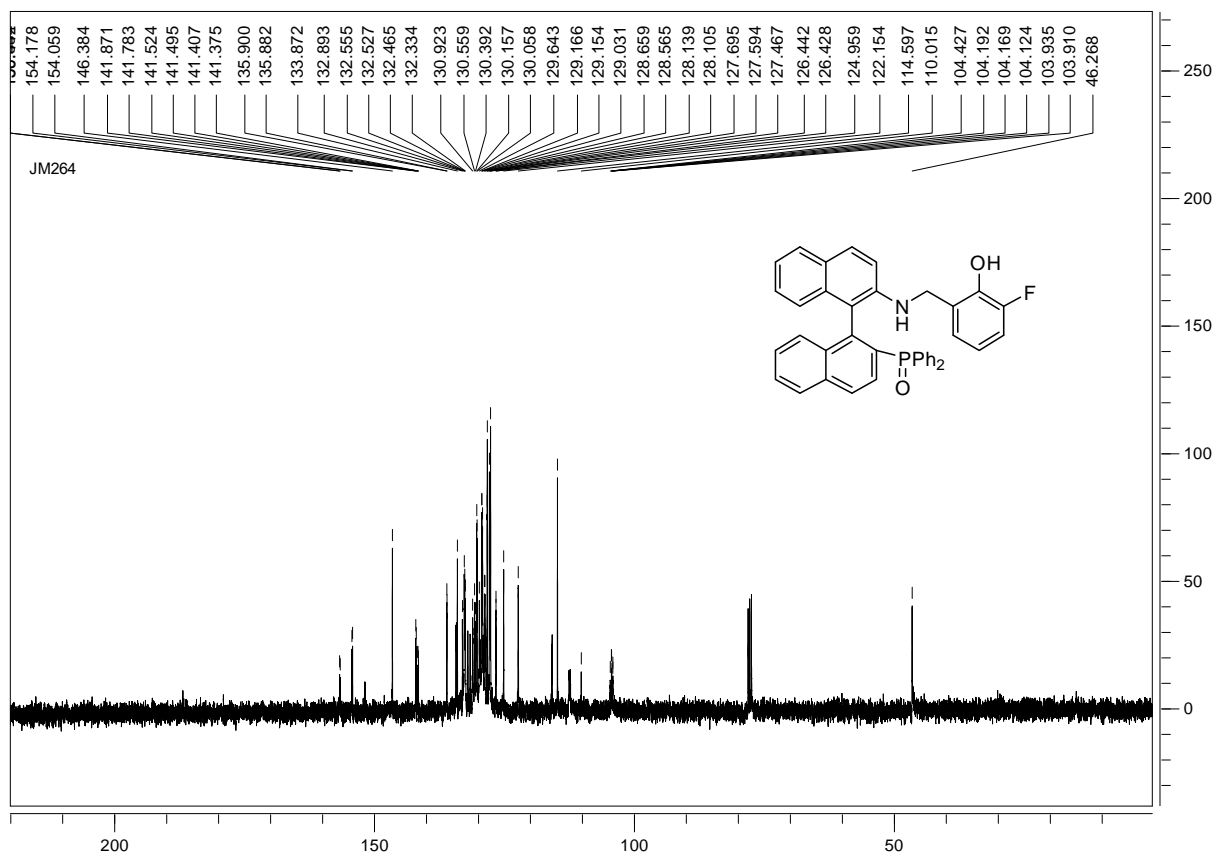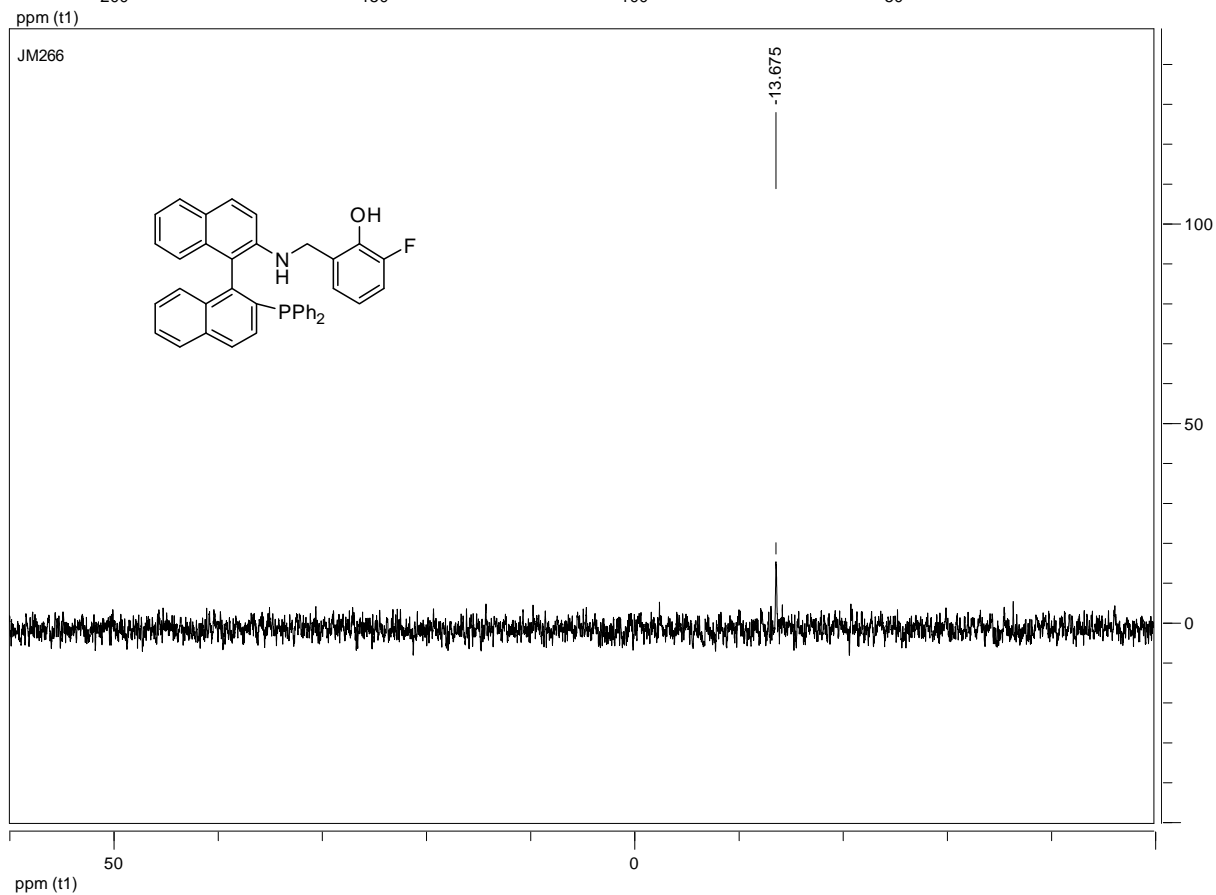





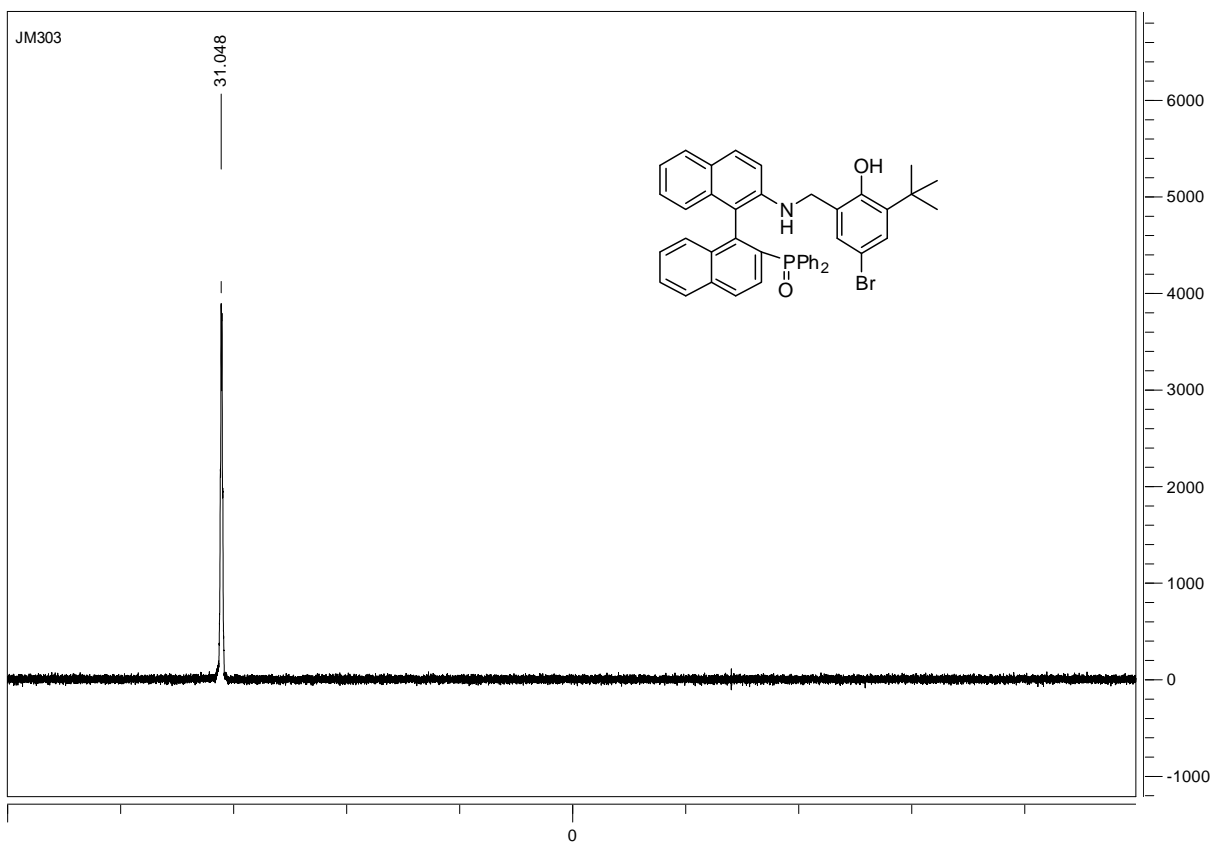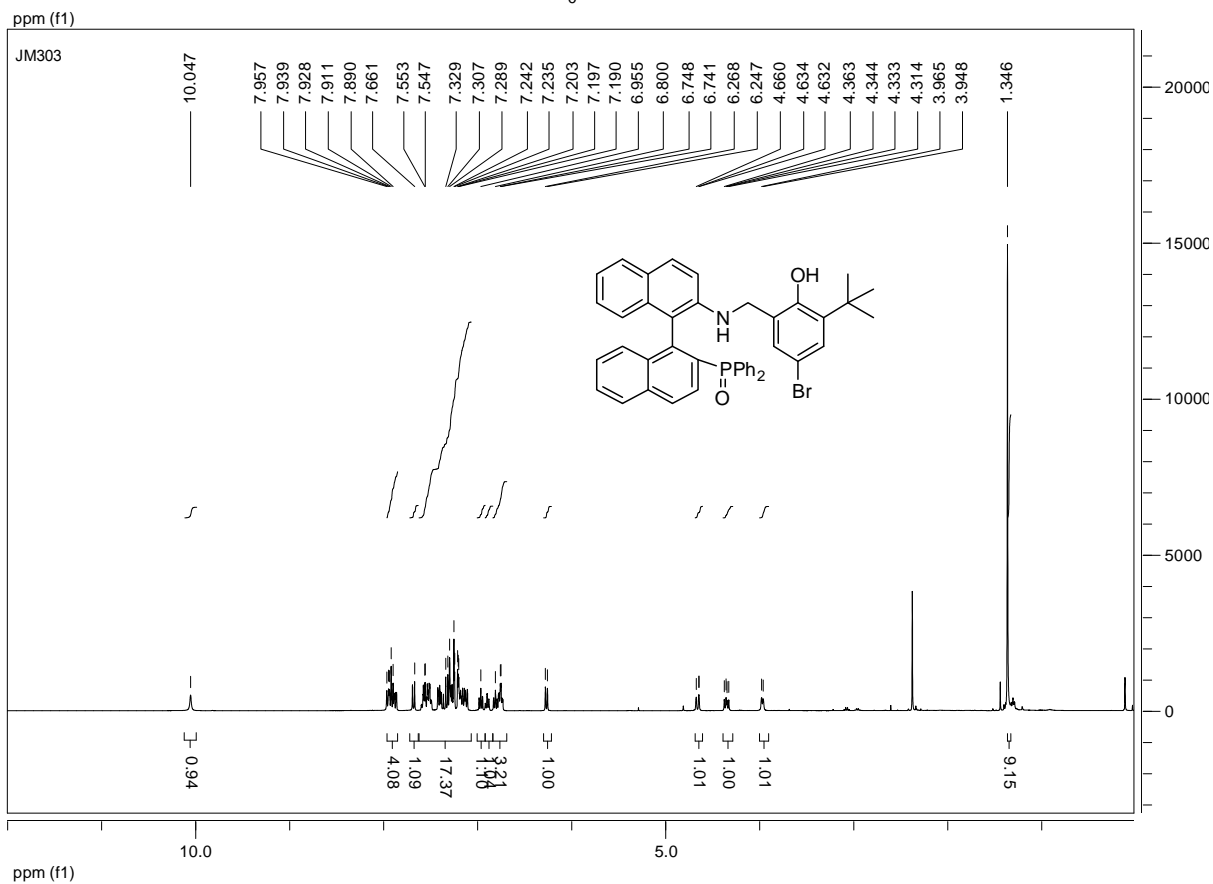

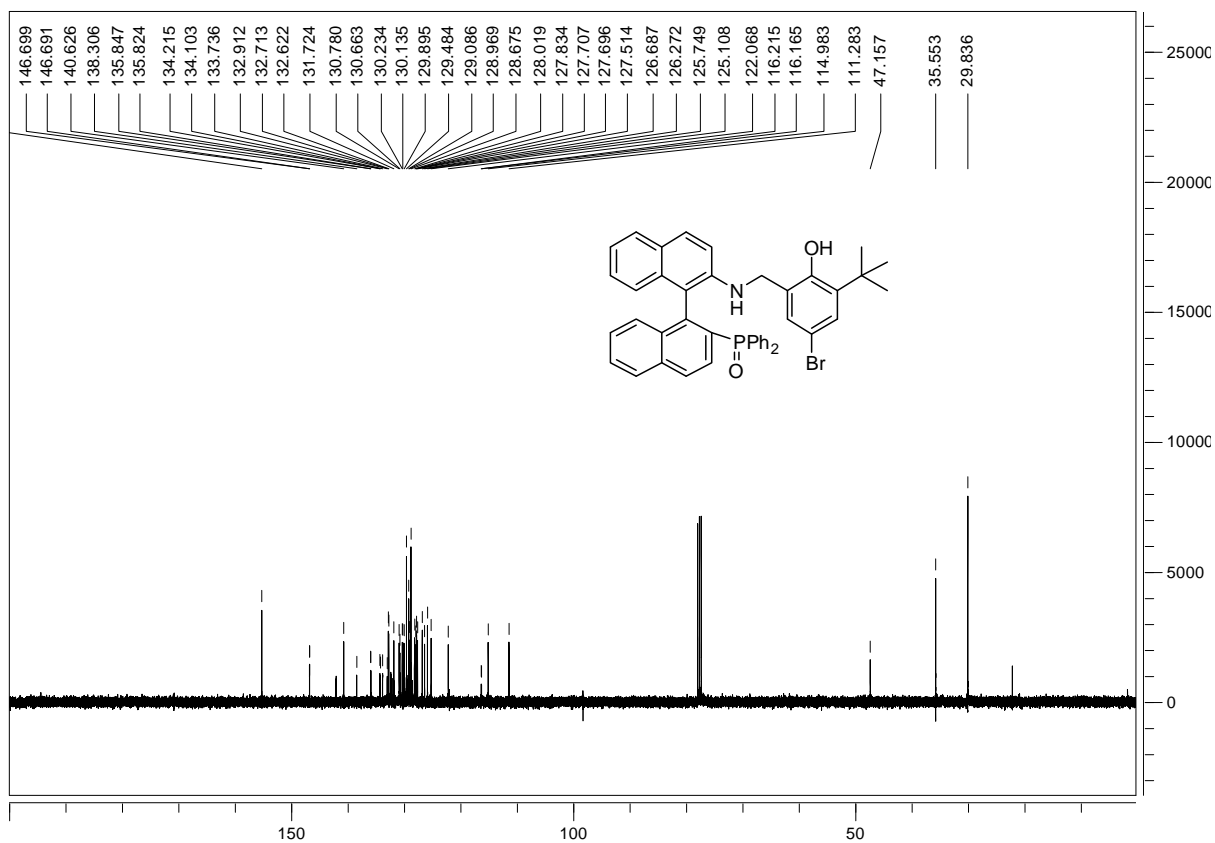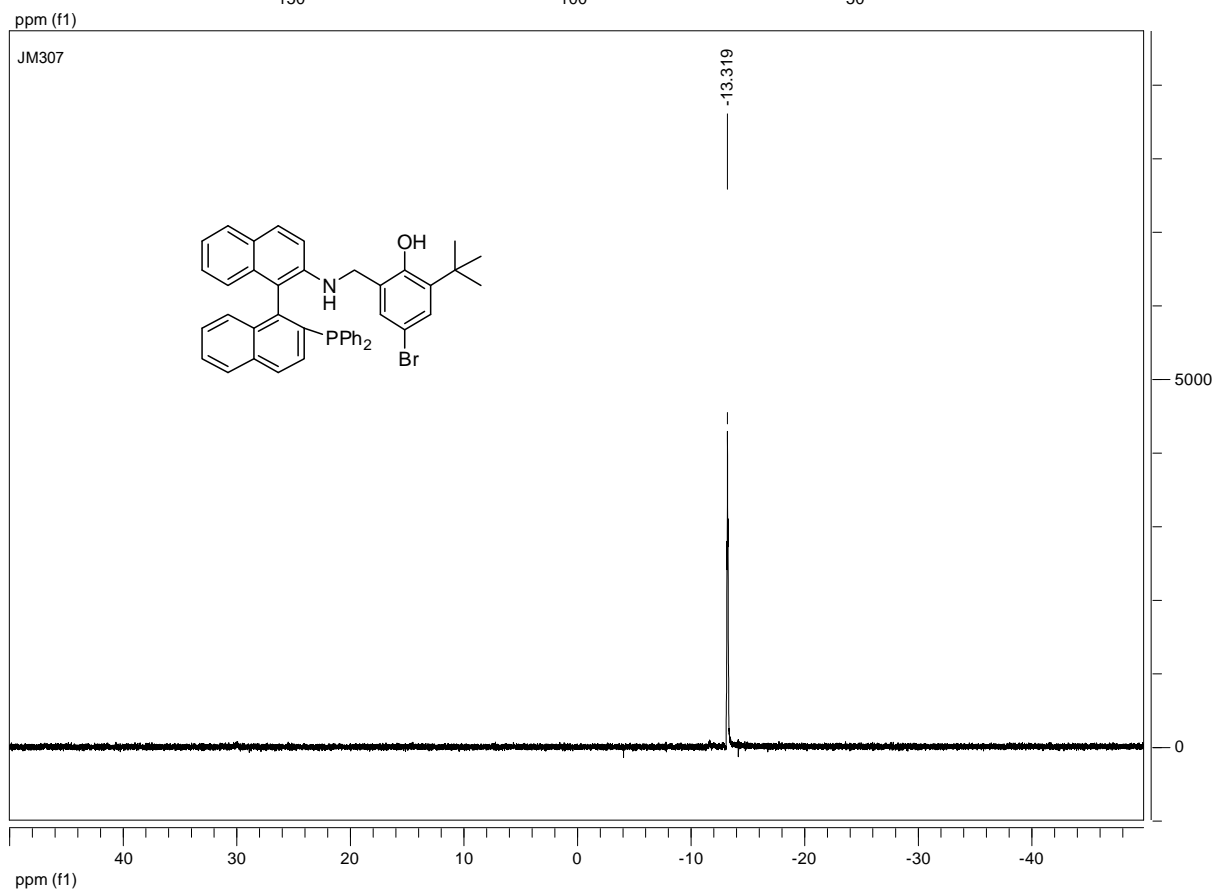

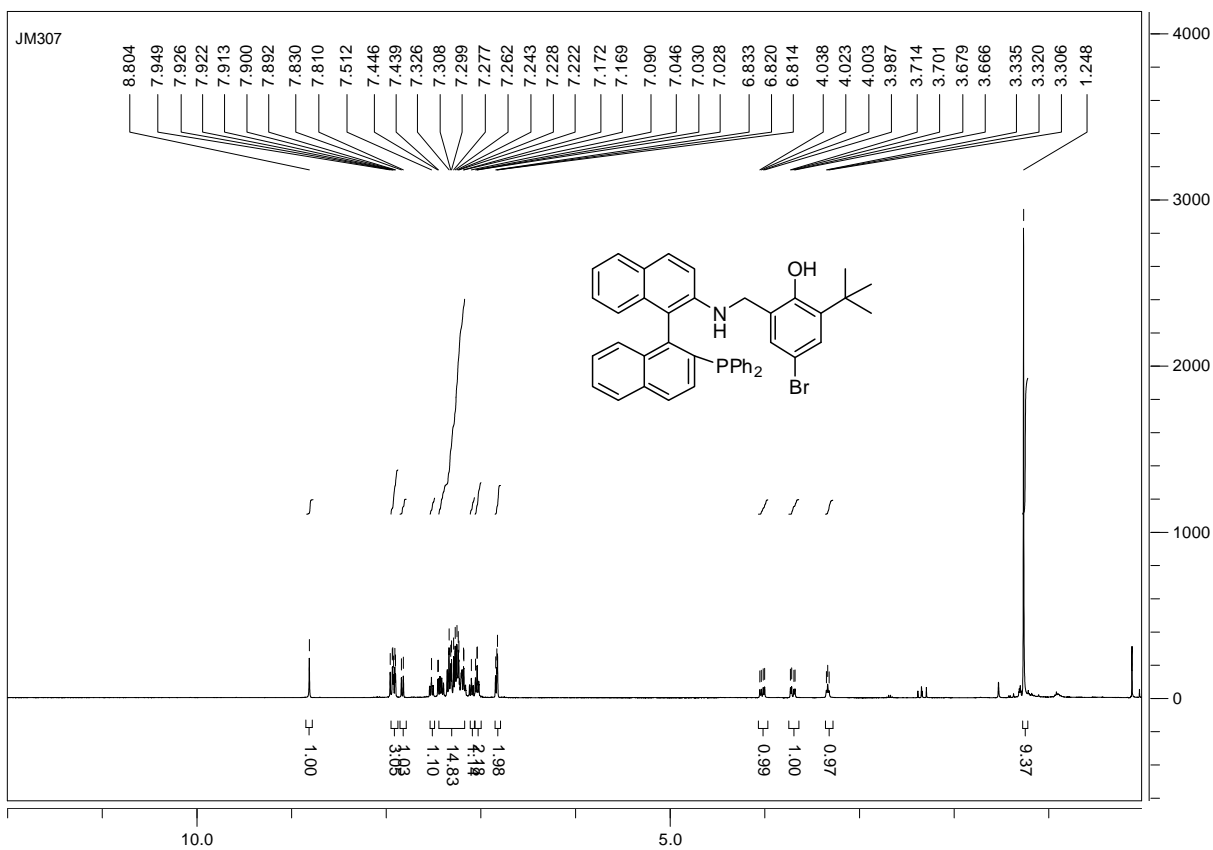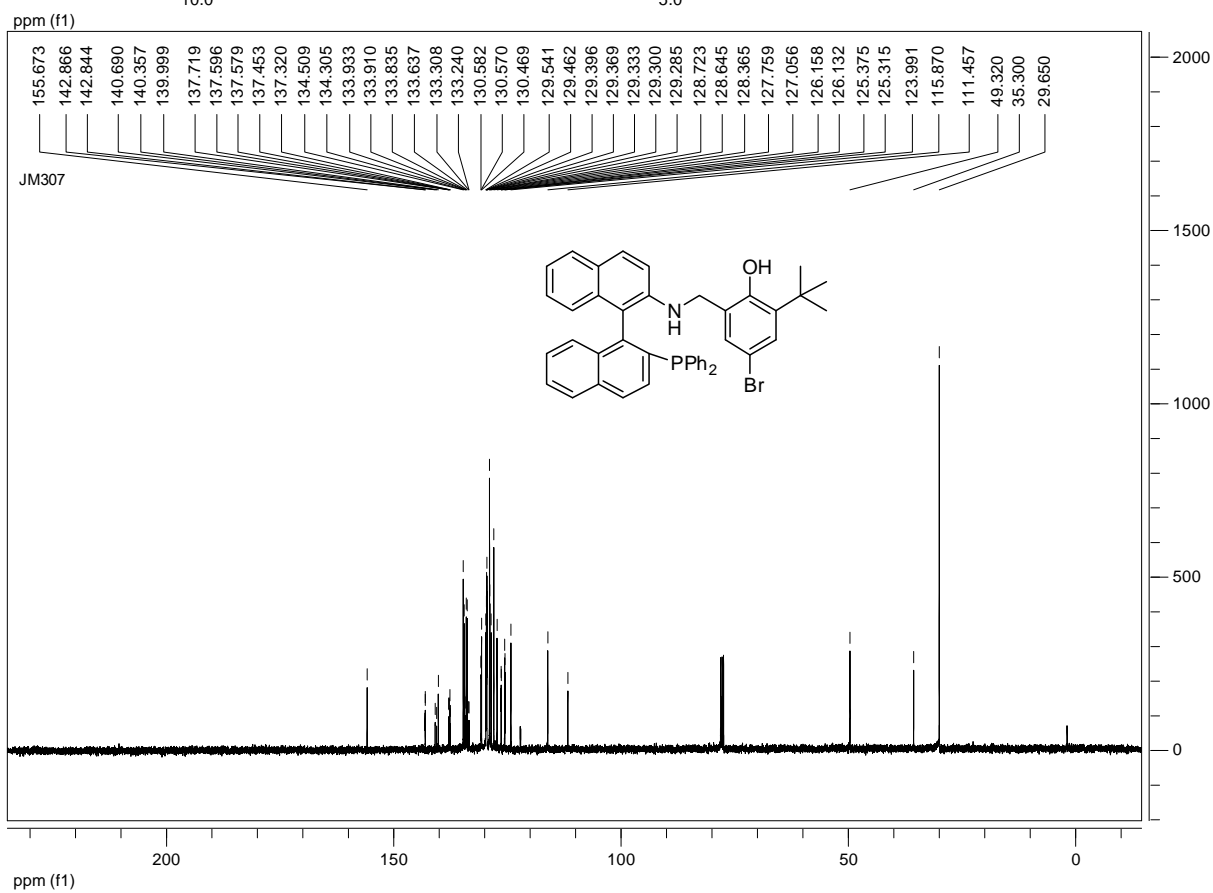

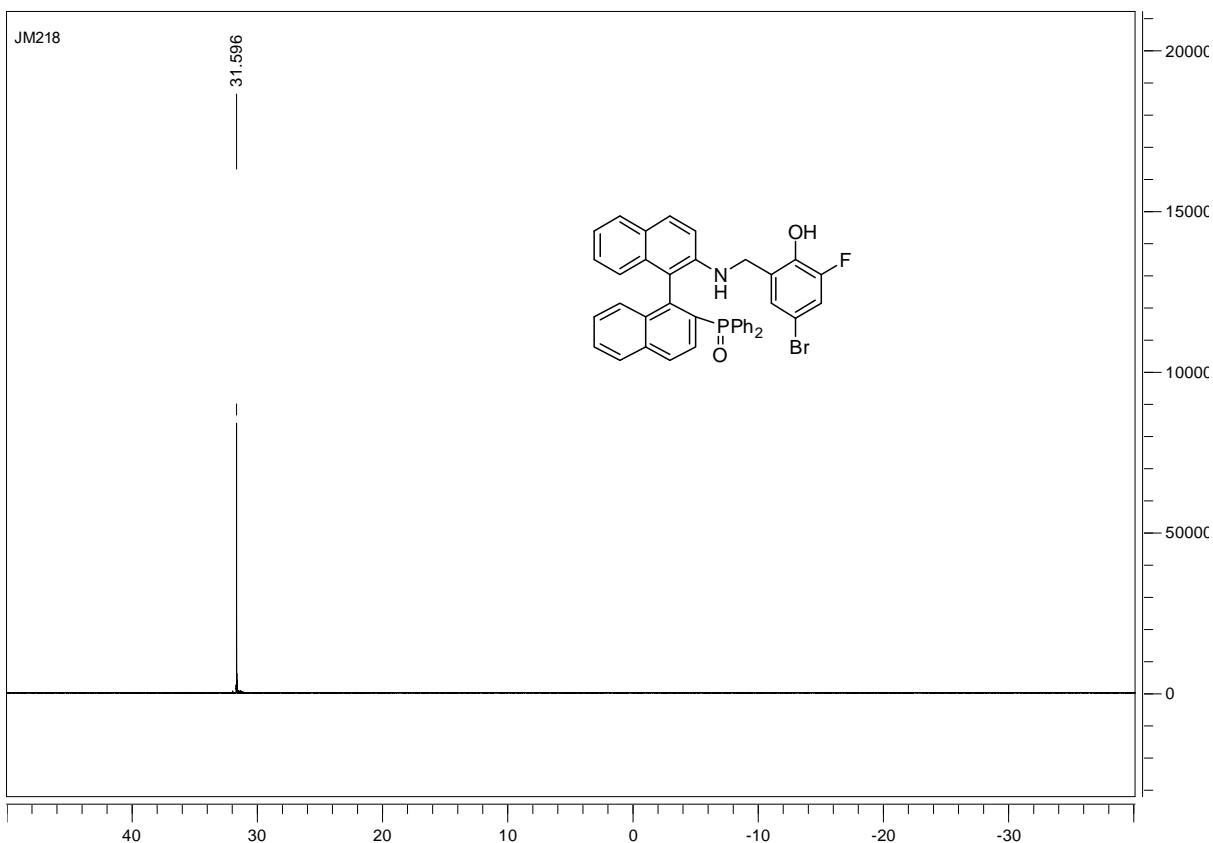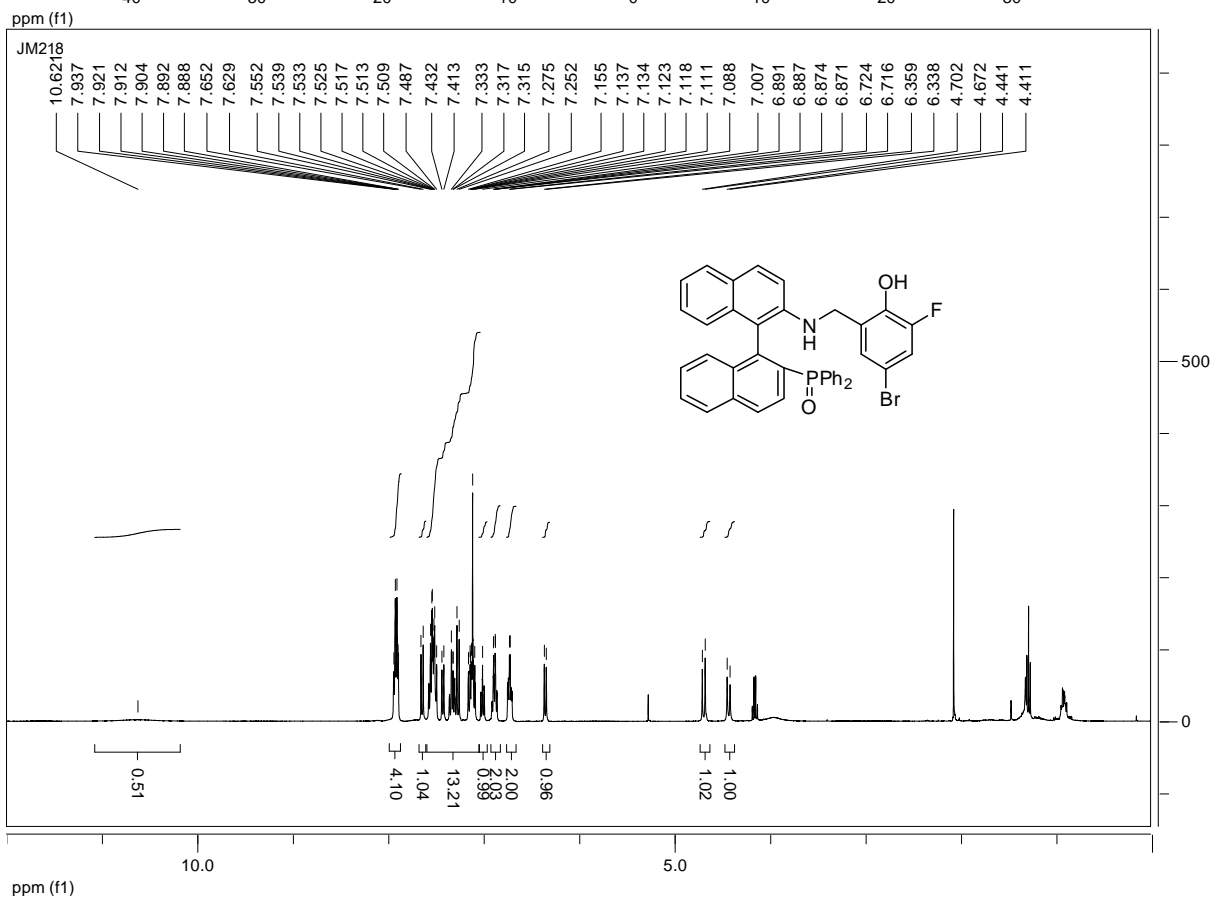

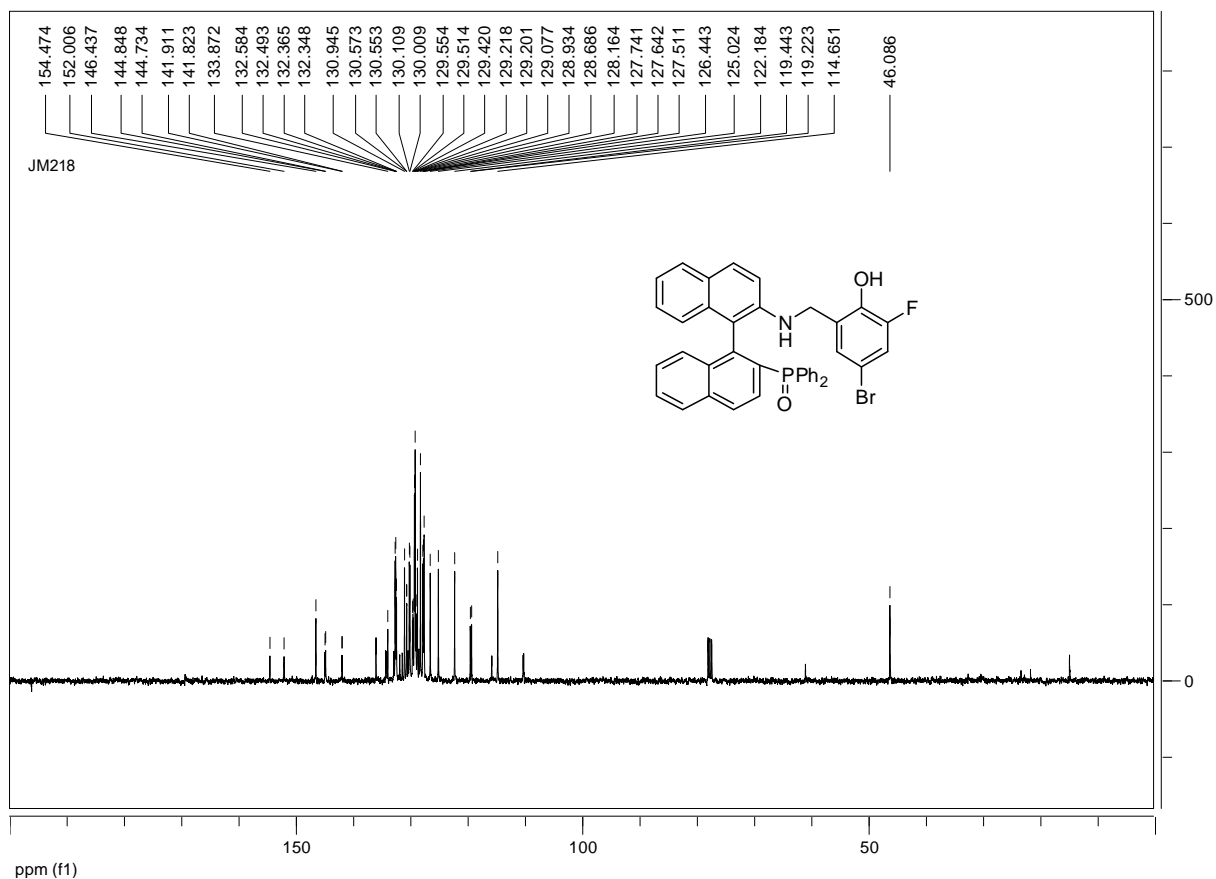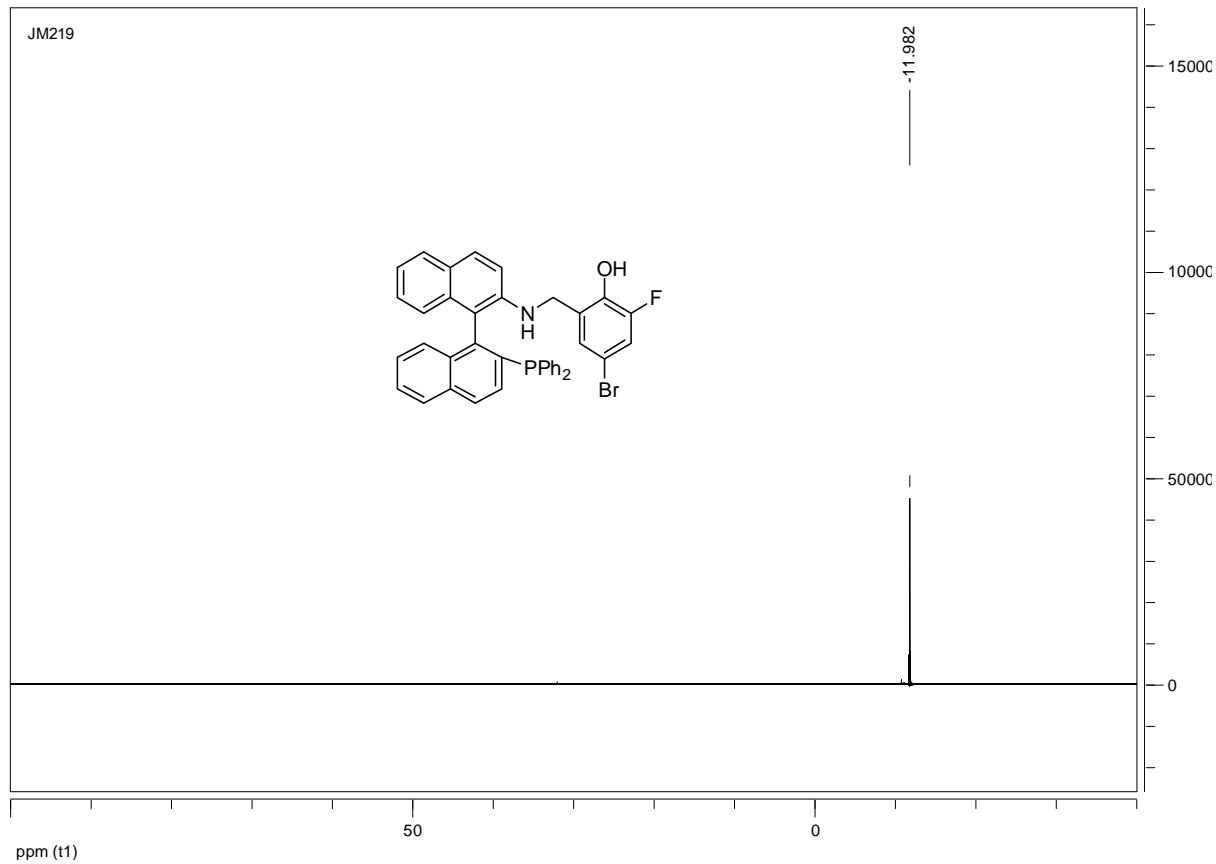

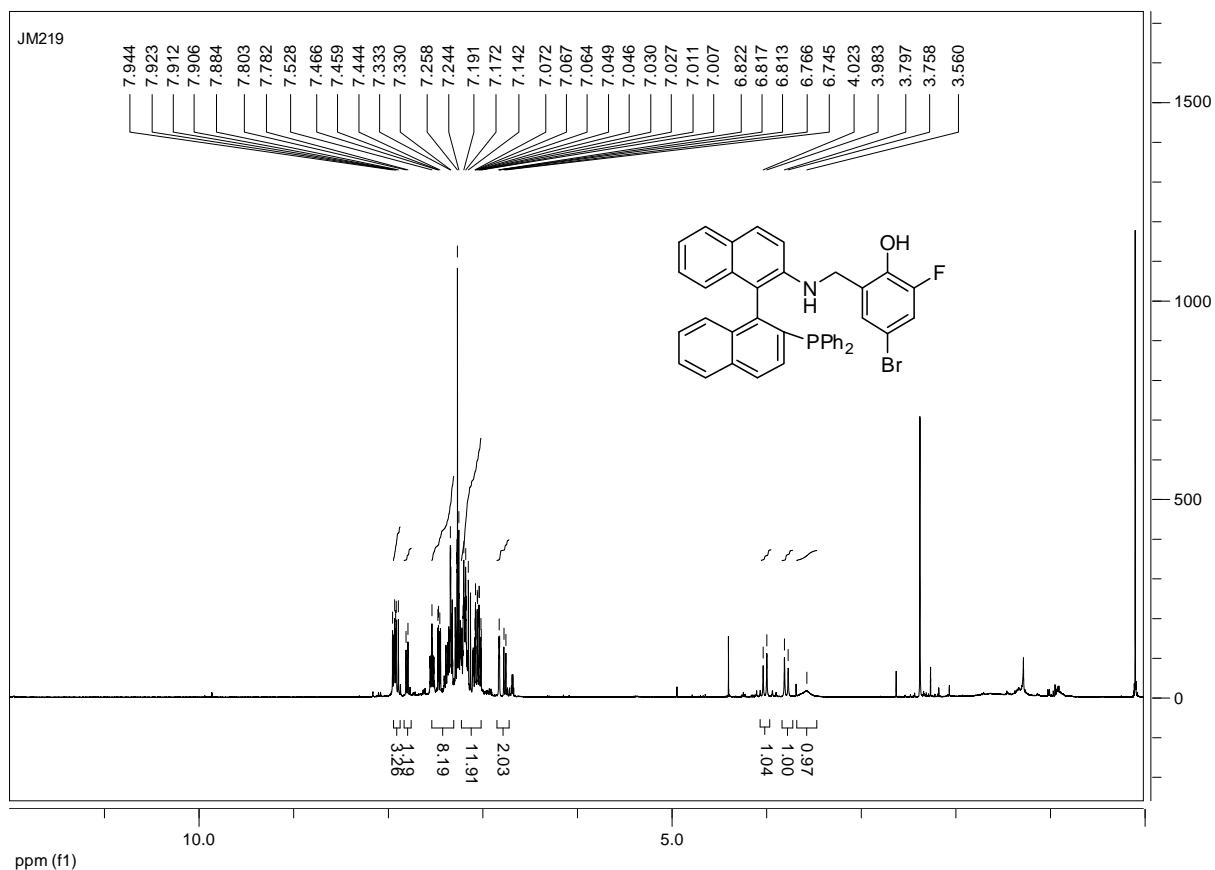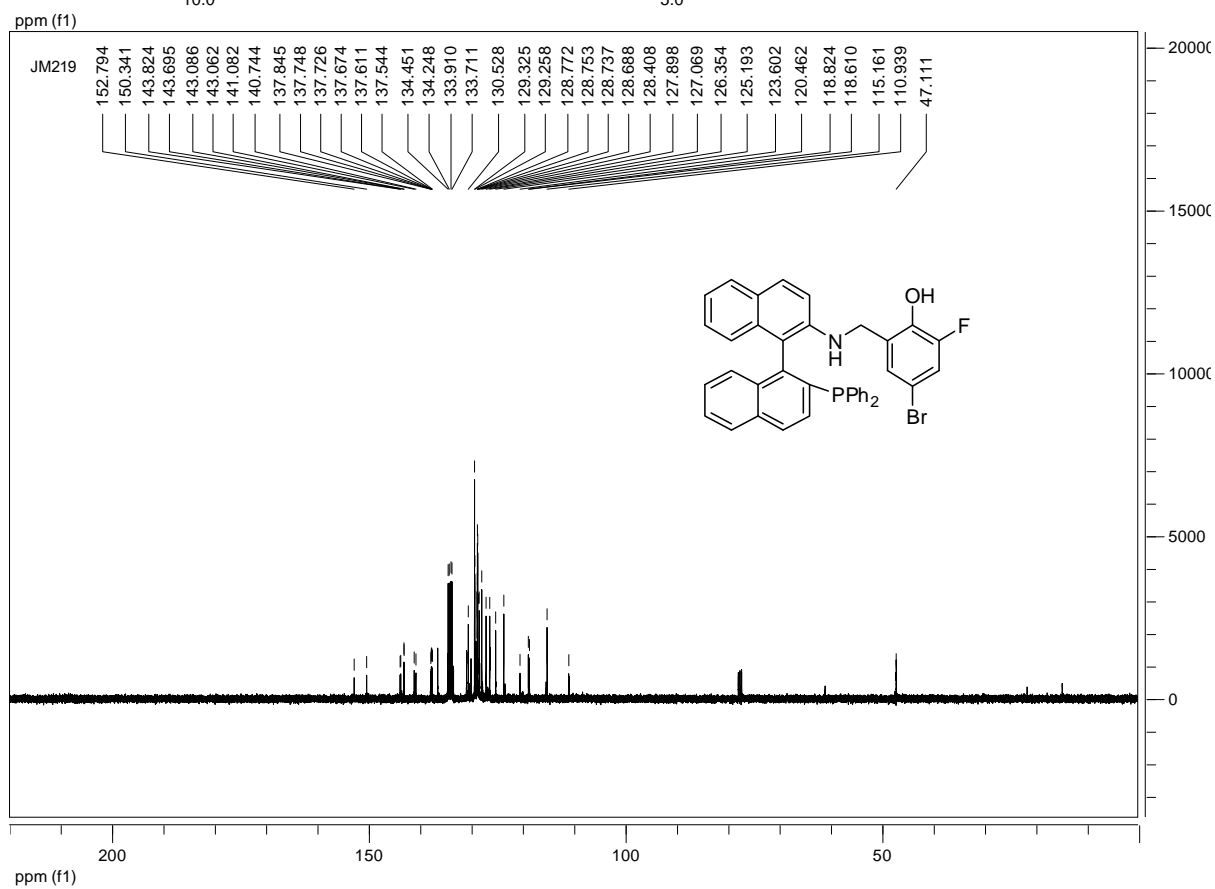

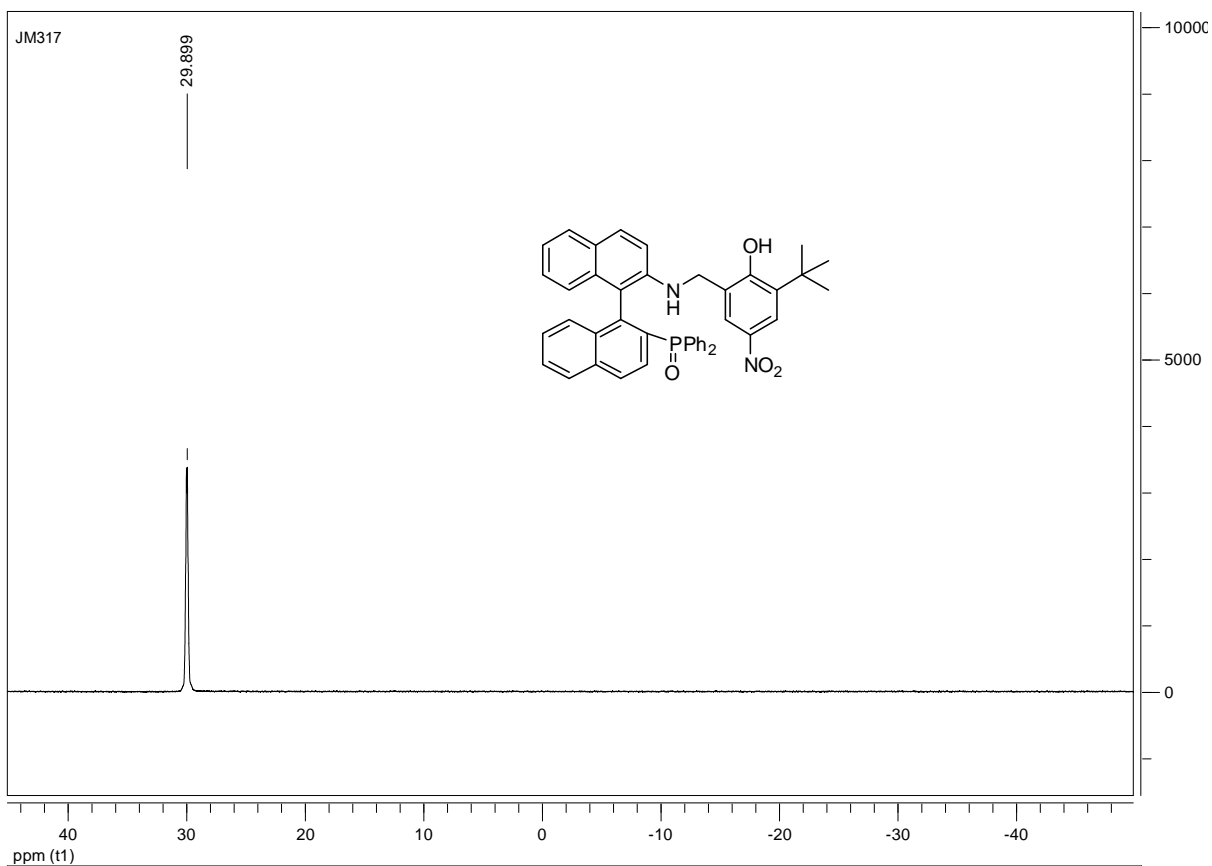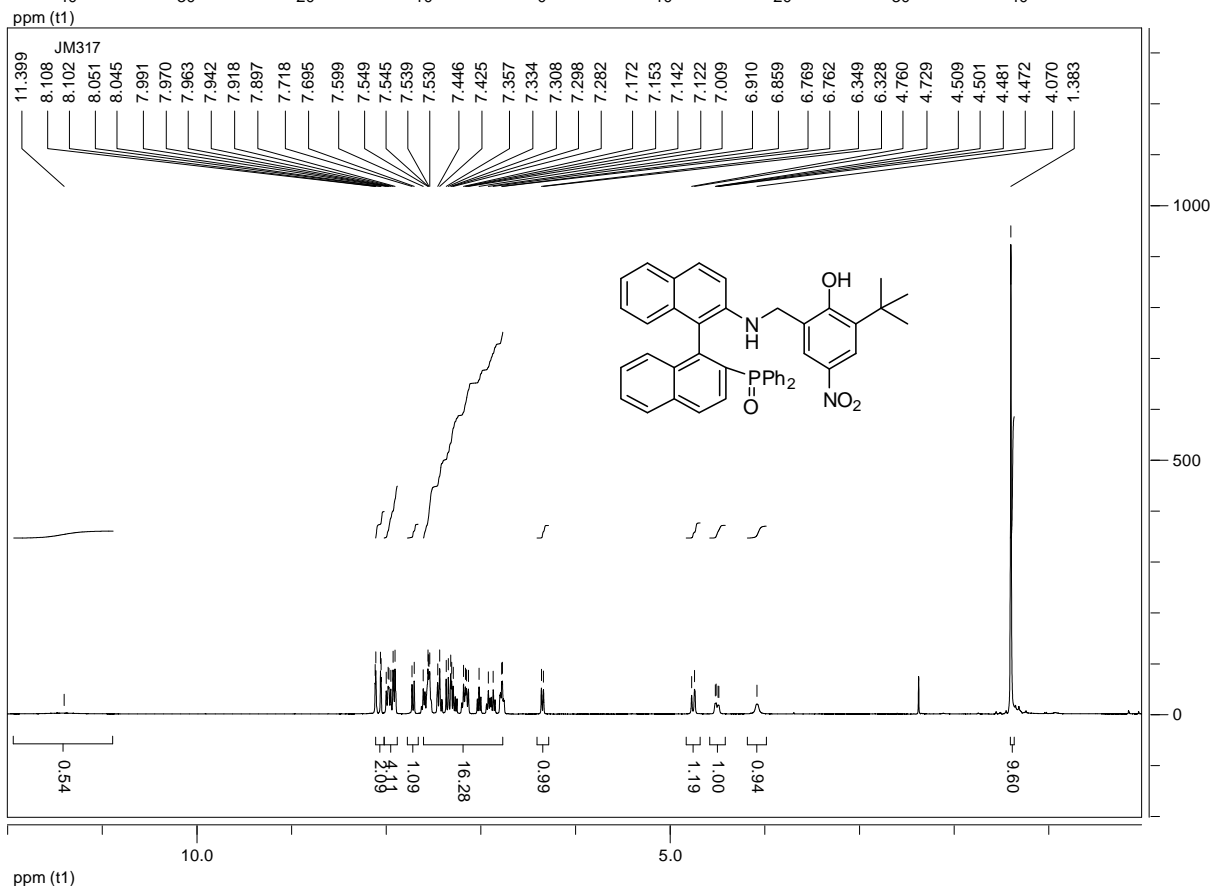

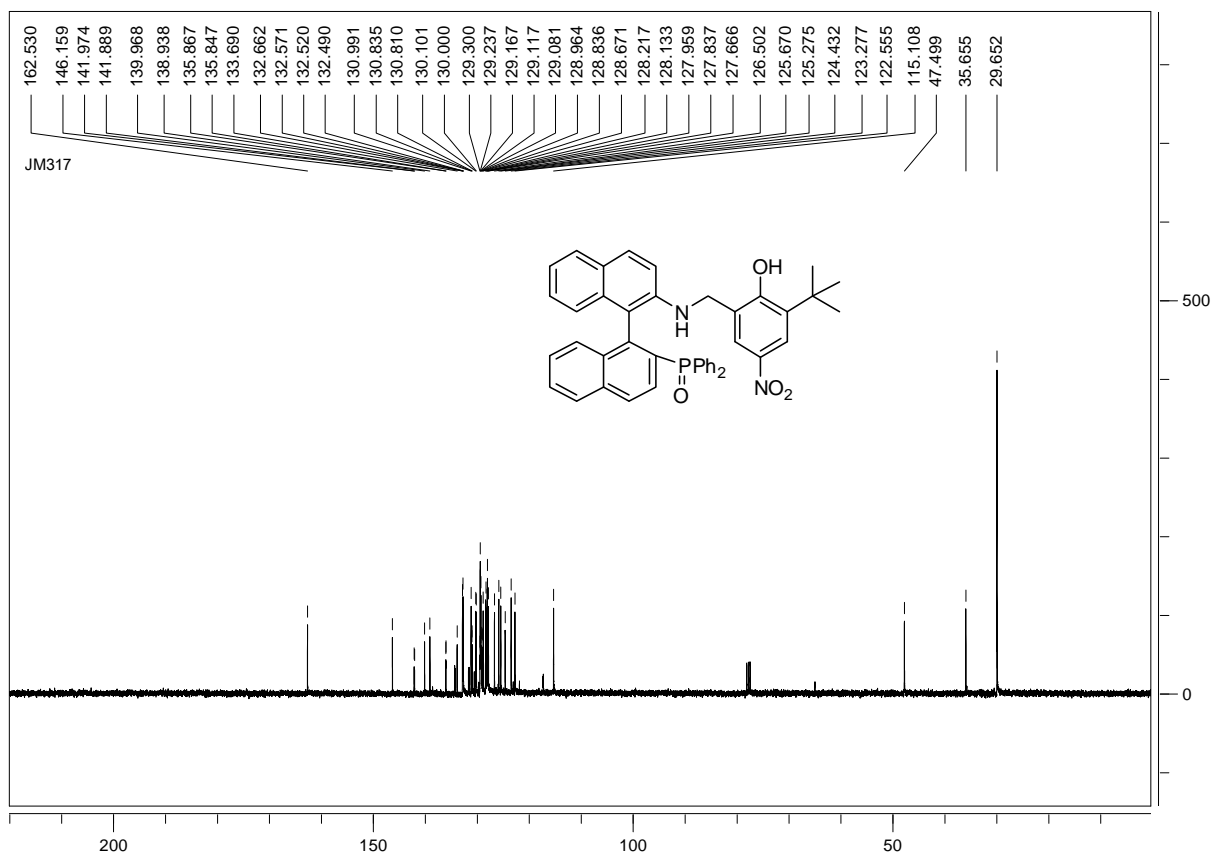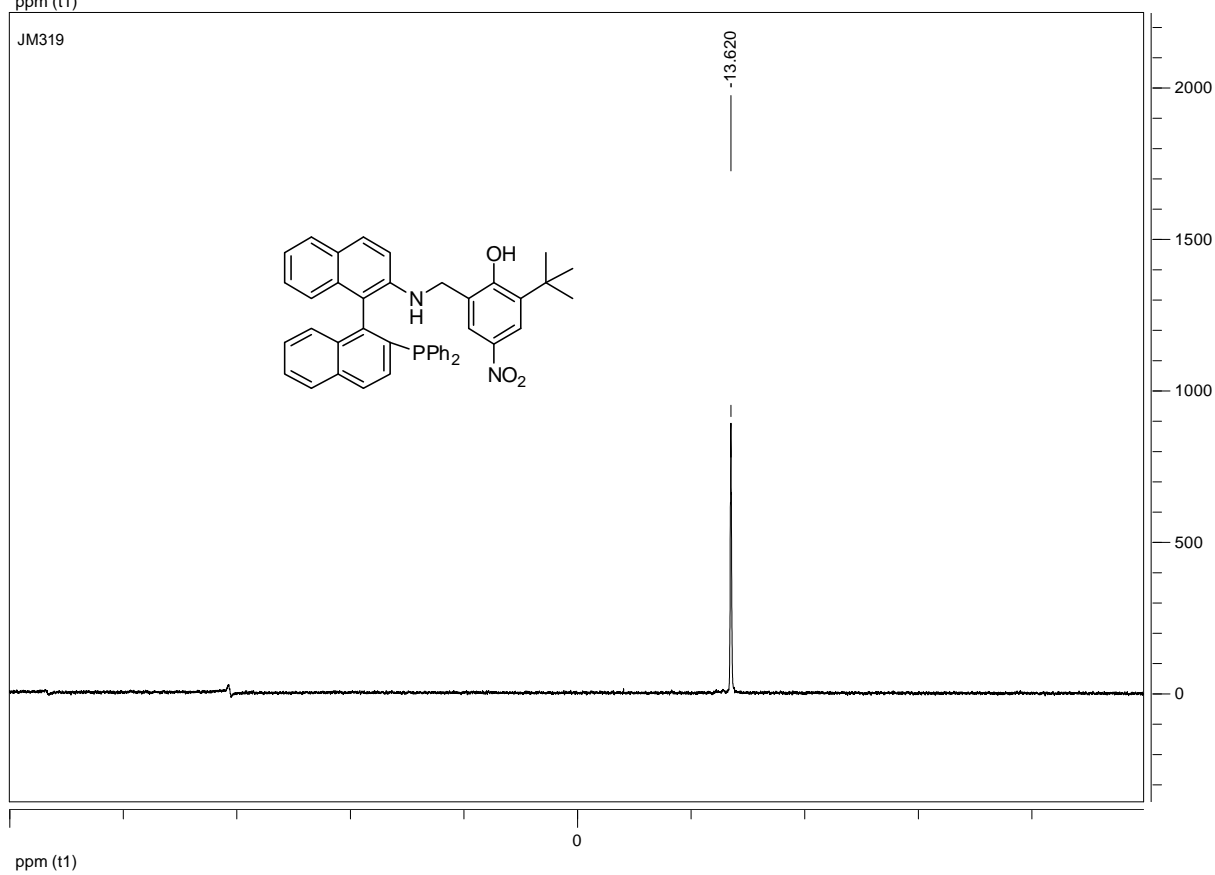



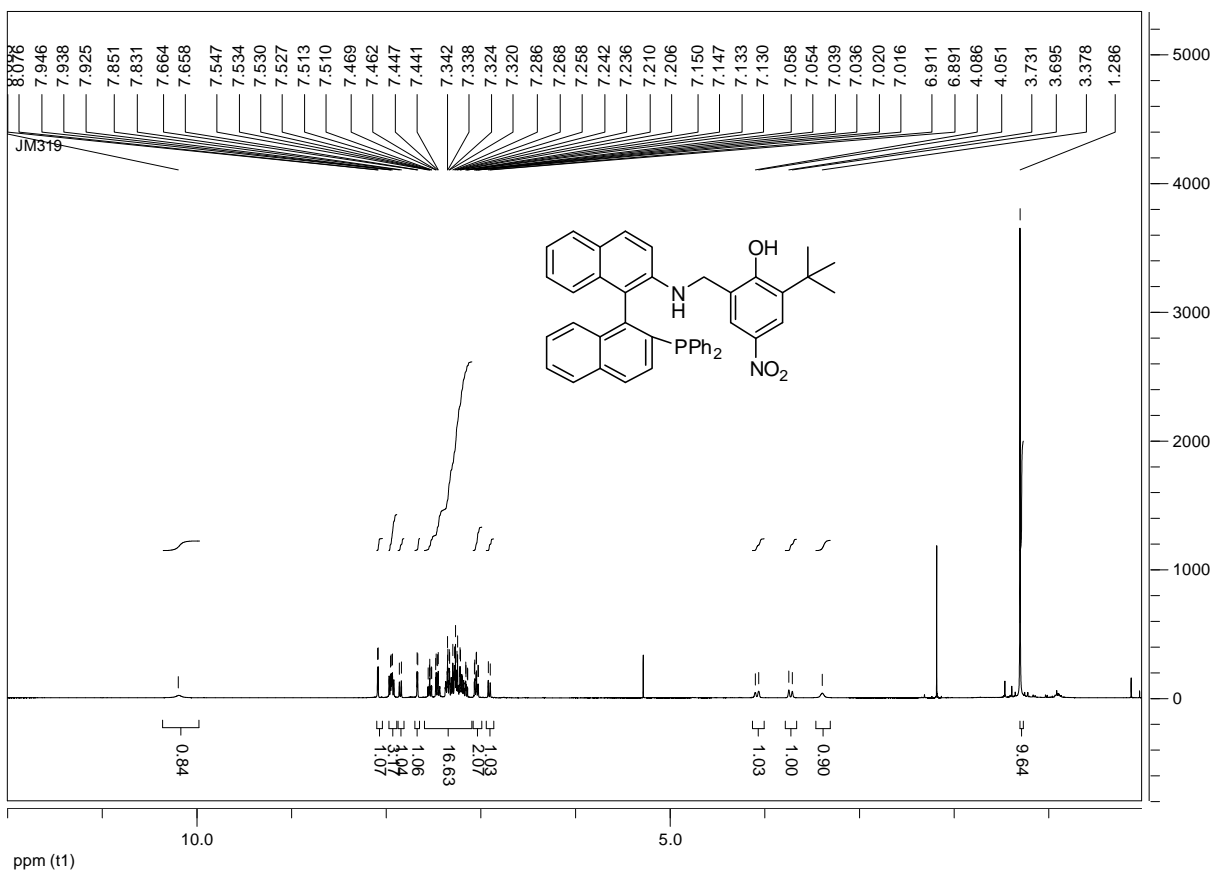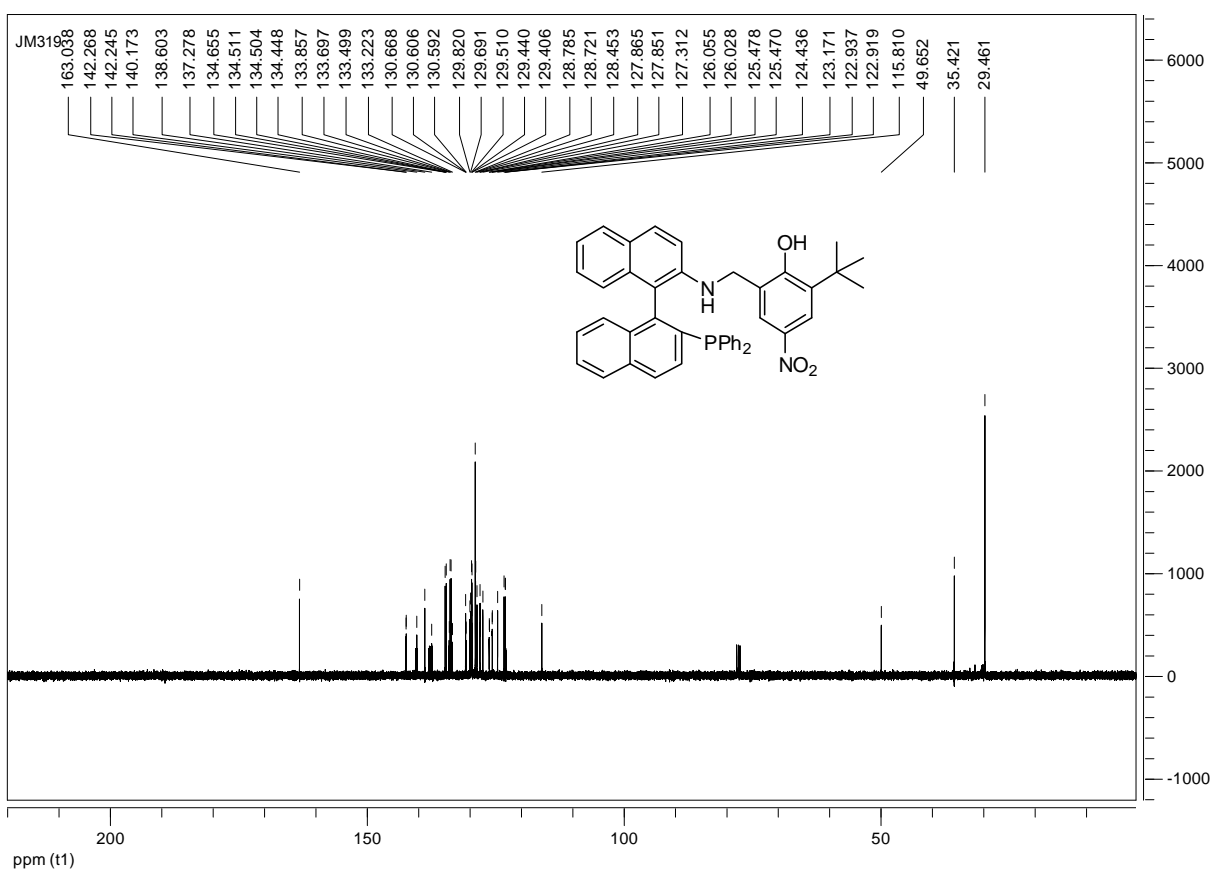

### III- NMR data of catalysts 1b'1b-1f'1f

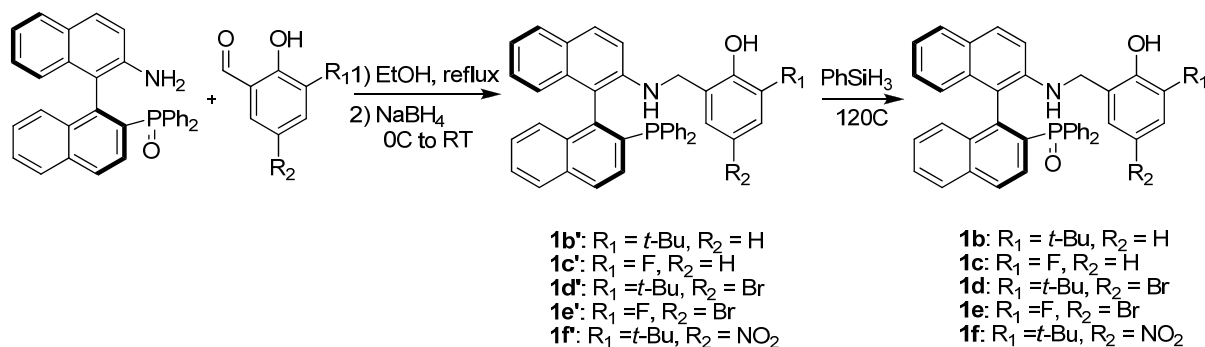

#### (*S*)-2-*tert*-butyl-6-((2'-(diphenylphosphoryl)-1,1'-binaphthyl-2-ylamino)methyl)phenol (1b')

**Yield: 76%**; <sup>1</sup>H NMR (400 MHz, CDCl<sub>3</sub>) δ 1.45 (s, 9H); 4.04 (d, *J* = 5.6 Hz, 1H); 4.48 (dd, *J*<sub>1</sub> = 12.0 Hz, *J*<sub>2</sub> = 7.6 Hz, 1H); 4.76 (d, *J* = 11.6 Hz, 1H); 6.28 (d, *J* = 8.0 Hz, 1H); 6.74-7.60 (m, 19H); 7.73 (d, *J* = 8.8 Hz, 1H); 7.87-8.03 (m, 4H); 9.90 (s, 1H); <sup>13</sup>C NMR (100 MHz, CDCl<sub>3</sub>) δ 30.1, 35.4, 47.6; <sup>31</sup>P NMR (162 MHz, CDCl<sub>3</sub>) δ +29.86; **ESI** [M+H<sup>+</sup>]: 632.2663, calcd for (C<sub>43</sub>H<sub>39</sub>NO<sub>2</sub>P)<sup>+</sup>: 632.2718; [α]<sub>D</sub> = +31.1 (c 2.00; CH<sub>2</sub>Cl<sub>2</sub>).

#### (*S*)-2-*tert*-butyl-6-((2'-(diphenylphosphino)-1,1'-binaphthyl-2-ylamino)methyl)phenol (1b)

**Yield: 67%**; off-white solid; **mp** 117-119°C; <sup>1</sup>H NMR (400 MHz, CDCl<sub>3</sub>) δ 1.29 (s, 9H); 3.38 (m, 1H); 3.82 (dd, *J*<sub>1</sub> = 13.6 Hz, *J*<sub>2</sub> = 4.4 Hz, 1H); 4.12 (dd, *J*<sub>1</sub> = 13.6 Hz, *J*<sub>2</sub> = 5.6 Hz, 1H); 6.73 (m, 3H); 7.03 (t, *J* = 7.2 Hz, 3H); 7.14-7.52 (m, 15H); 7.79 (d, *J* = 8.0 Hz, 1H); 7.88-7.94 (m, 3H); 8.69 (s, 1H); <sup>13</sup>C NMR (100 MHz, CDCl<sub>3</sub>) δ 29.9, 35.1, 49.6; <sup>31</sup>P NMR (162 MHz, CDCl<sub>3</sub>) δ -13.01; **ESI** [M+H<sup>+</sup>]: 616.2780, calcd for (C<sub>43</sub>H<sub>39</sub>NOP)<sup>+</sup>: 616.2769; [α]<sub>D</sub> = +6.6 (c 1.22; CH<sub>2</sub>Cl<sub>2</sub>).

#### (*S*)-2-((2'-(diphenylphosphoryl)-1,1'-binaphthyl-2-ylamino)methyl)-6-fluorophenol (1c')

**Yield: 81%**; <sup>1</sup>H NMR (400 MHz, CDCl<sub>3</sub>) δ 4.36 (d, *J* = 12.0 Hz, 1H); 4.67 (d, *J* = 12.0 Hz, 1H); 6.29 (d, *J* = 8.4 Hz, 1H); 6.66-6.76 (m, 4H); 6.82-6.88 (m, 2H); 6.98 (t, *J* = 6.8 Hz, 1H); 7.03-7.09 (m, 2H); 7.24-7.62 (m, 11H); 7.84-7.92 (m, 4H); <sup>13</sup>C NMR (100 MHz, CDCl<sub>3</sub>) δ 46.3; <sup>31</sup>P NMR (162 MHz, CDCl<sub>3</sub>) δ +30.16; [α]<sub>D</sub> = +61.2 (c 2.00; CH<sub>2</sub>Cl<sub>2</sub>).

**(S)- 2-((2'-(diphenylphosphino)-1,1'-binaphthyl-2-ylamino)methyl)-6-fluorophenol (1c)**

**Yield:** 61%; off-white solid; **mp** 124-126°C; **<sup>1</sup>H NMR** (400 MHz, CDCl<sub>3</sub>) δ 3.85 (d, *J* = 16.0 Hz, 1H); 4.05 (d, *J* = 16.0 Hz, 1H); 6.48 (d, *J* = 8.8 Hz, 1H); 6.71 (t, *J* = 9.4 Hz, 1H); 6.78 (d, *J* = 8.4 Hz, 1H); 7.05-7.54 (m, 18H); 7.79 (d, *J* = 8.0 Hz, 1H); 7.89-7.96 (m, 3H); **<sup>13</sup>C NMR** (100 MHz, CDCl<sub>3</sub>) δ 46.9; **<sup>31</sup>P NMR** (162 MHz, CDCl<sub>3</sub>) δ -13.67; **ESI** [M+H<sup>+</sup>]: 578.2056, calcd for (C<sub>39</sub>H<sub>30</sub>NOFP)<sup>+</sup>: 578.2049; [α]<sub>D</sub> = +16.9 (c 1.05; CH<sub>2</sub>Cl<sub>2</sub>).

**(S)-4-bromo-2-tert-butyl-6-((2'-(diphenylphosphoryl)-1,1'-binaphthyl-2-ylamino)methyl)phenol (1d')**

**Yield:** 95%; **<sup>1</sup>H NMR** (400 MHz, CDCl<sub>3</sub>) δ 1.35 (s, 9H); 3.95 (d, *J* = 6.8 Hz, 1H); 4.34 (dd, *J*<sub>1</sub> = 13.2 Hz, *J*<sub>2</sub> = 7.6 Hz, 1H); 4.63 (d, *J* = 11.2 Hz, 1H); 6.25 (d, *J* = 8.4 Hz, 1H); 6.72-6.82 (m, 3H); 6.89 (t, *J* = 7.6 Hz, 1H); 6.96 (t, *J* = 7.6 Hz, 1H); 7.10-7.59 (m, 13H); 7.67 (d, *J* = 8.8 Hz, 1H); 7.85-7.96 (m, 4H); 10.04 (s, 1H); **<sup>13</sup>C NMR** (100 MHz, CDCl<sub>3</sub>) δ 29.8, 35.5, 47.1; **<sup>31</sup>P NMR** (162 MHz, CDCl<sub>3</sub>) δ +31.05; **ESI** [M+H<sup>+</sup>]: 710.1700, calcd for (C<sub>43</sub>H<sub>38</sub>NO<sub>2</sub>PBr)<sup>+</sup>: 710.1823; [α]<sub>D</sub> = +84.2 (c 1.00; CH<sub>2</sub>Cl<sub>2</sub>).

**(S)-4-bromo-2-tert-butyl-6-((2'-(diphenylphosphino)-1,1'-binaphthyl-2-ylamino)methyl)phenol (1d)**

**Yield:** 67%; off-white solid; **mp** 126-128°C; **<sup>1</sup>H NMR** (400 MHz, CDCl<sub>3</sub>) δ 1.25 (s, 9H); 3.32 (t, *J* = 6.0 Hz, 1H); 3.69 (dd, *J*<sub>1</sub> = 14.0 Hz, *J*<sub>2</sub> = 5.2 Hz, 1H); 4.01 (dd, *J*<sub>1</sub> = 14.0 Hz, *J*<sub>2</sub> = 6.0 Hz, 1H); 6.82 (m, 2H); 7.03 (t, *J* = 6.8 Hz, 2H); 7.09 (t, *J* = 7.6 Hz, 1H); 7.16-7.44 (m, 14H); 7.51 (t, *J* = 7.4 Hz, 1H); 7.82 (d, *J* = 8.0 Hz, 1H); 7.89-7.95 (m, 3H); 8.80 (s, 1H); **<sup>13</sup>C NMR** (100 MHz, CDCl<sub>3</sub>) δ 29.6, 35.3, 49.3; **<sup>31</sup>P NMR** (162 MHz, CDCl<sub>3</sub>) δ -13.32; **ESI** [M+H<sup>+</sup>]: 694.1850, calcd for (C<sub>43</sub>H<sub>38</sub>NOPBr)<sup>+</sup>: 694.1874; [α]<sub>D</sub> = +16.6 (c 1.01; CH<sub>2</sub>Cl<sub>2</sub>).

**(S)-4-bromo-2-((2'-(diphenylphosphoryl)-1,1'-binaphthyl-2-ylamino)methyl)-6-fluorophenol (1e')**

**Yield:** 83%; **<sup>1</sup>H NMR** (400 MHz, CDCl<sub>3</sub>) δ 3.95 (br s, 1H); 4.42 (d, *J* = 12.0 Hz, 1H); 4.69 (d, *J* = 12.0 Hz, 1H); 6.34 (d, *J* = 8.4 Hz, 1H); 6.72 (m, 2H); 6.88 (m, 2H); 7.00 (t, *J* = 7.4 Hz, 1H); 7.08-7.52 (m, 13H); 7.64 (d, *J* = 9.2 Hz, 1H); 7.89-7.94 (m, 4H); 10.62 (br s, 1H); **<sup>13</sup>C NMR** (100 MHz, CDCl<sub>3</sub>) δ 46.1; **<sup>31</sup>P NMR** (162 MHz, CDCl<sub>3</sub>) δ +31.59; **ESI** [M+H<sup>+</sup>]: 672.1038, calcd for (C<sub>39</sub>H<sub>29</sub>NO<sub>2</sub>PBrF)<sup>+</sup>: 672.1103; [α]<sub>D</sub> = +129.8 (c 1.96; CH<sub>2</sub>Cl<sub>2</sub>).

**(S)-4-bromo-2-((2'-(diphenylphosphino)-1,1'-binaphthyl-2-ylamino)methyl)-6-fluorophenol (1e)**

**Yield:** 89%; off-white solid; **mp** 133-135°C; **<sup>1</sup>H NMR** (400 MHz, CDCl<sub>3</sub>) δ 3.56 (br s, 1H); 3.77 (d, *J* = 15.6 Hz, 1H); 4.00 (d, *J* = 16.0 Hz, 1H); 6.80 (m, 2H); 7.01-7.53 (m, 18H); 7.79 (d, *J* = 8.4 Hz, 1H); 7.88-7.95 (m, 3H); **<sup>13</sup>C NMR** (100 MHz, CDCl<sub>3</sub>) δ 47.1; **<sup>31</sup>P NMR** (162 MHz, CDCl<sub>3</sub>) δ -11.98; **ESI** [M+H<sup>+</sup>]: 656.1133, calcd for (C<sub>39</sub>H<sub>29</sub>NOPBrF)<sup>+</sup>: 656.1154; [α]<sub>D</sub> = +28.1 (c 1.02; CH<sub>2</sub>Cl<sub>2</sub>).

**(S)-2-tert-butyl-6-((2'-(diphenylphosphoryl)-1,1'-binaphthyl-2-ylamino)methyl)-4-nitrophenol (1f')**

**Yield:** 82%; **<sup>1</sup>H NMR** (400 MHz, CDCl<sub>3</sub>) δ 4.07 (br s, 1H); 4.49 (d, *J* = 11.2 Hz, 1H); 4.74 (d, *J* = 12.4 Hz, 1H); 6.33 (d, *J* = 8.4 Hz, 1H); 6.76 (m, 2H); 6.89 (m, 2H); 7.01 (t, *J* = 7.2 Hz, 1H); 7.12-7.60 (m, 12H); 7.70 (d, *J* = 9.2 Hz, 1H); 7.90-8.11 (m, 6H); **<sup>13</sup>C NMR** (100 MHz, CDCl<sub>3</sub>) δ 29.6, 35.7, 47.5; **<sup>31</sup>P NMR** (162 MHz, CDCl<sub>3</sub>) δ +29.90; **ESI** [M+H<sup>+</sup>]: 677.2582, calcd for (C<sub>43</sub>H<sub>38</sub>N<sub>2</sub>O<sub>4</sub>P)<sup>+</sup>: 677.2569; [α]<sub>D</sub> = +118.7 (c 2.00; CH<sub>2</sub>Cl<sub>2</sub>).

**(S)-2-tert-butyl-6-((2'-(diphenylphosphino)-1,1'-binaphthyl-2-ylamino)methyl)-4-nitrophenol (1f)**

**Yield:** 73%; off-white solid; **mp** 125-127°C; **<sup>1</sup>H NMR** (400 MHz, CDCl<sub>3</sub>) δ 3.38 (br s, 1H); 3.71 (d, *J* = 14.4 Hz, 1H); 4.07 (d, *J* = 14.0 Hz, 1H); 6.90 (d, *J* = 8.0 Hz, 1H); 7.03 (dt, *J*<sub>1</sub> = 7.6 Hz, *J*<sub>2</sub> = 1.6 Hz, 2H); 7.13-7.36 (m, 12H); 7.42-7.47 (m, 2H); 7.53 (t, *J* = 7.2 Hz, 1H); 7.66 (d, *J* = 2.4 Hz, 1H); 7.84 (d, *J* = 8.0 Hz, 1H); 7.91-7.96 (m, 3H); 8.08 (d, *J* = 2.6 Hz, 1H); 10.19 (br s, 1H); **<sup>13</sup>C NMR** (100 MHz, CDCl<sub>3</sub>) δ 29.5, 35.4, 49.7; **<sup>31</sup>P NMR** (162 MHz, CDCl<sub>3</sub>) δ -13.62; **ESI** [M+H<sup>+</sup>]: 661.2601, calcd for (C<sub>43</sub>H<sub>38</sub>N<sub>2</sub>O<sub>3</sub>P)<sup>+</sup>: 661.2620; [α]<sub>D</sub> = +18.9 (c 1.06; CH<sub>2</sub>Cl<sub>2</sub>).

**IV-NMR data of MBH adducts**

**3-((3-nitrophenyl)(tosylamino)methyl)but-3-en-2-one (3a).** **<sup>1</sup>H NMR** (400 MHz, CDCl<sub>3</sub>) δ 2.16 (s, 3H); 2.39 (s, 3H); 5.30 (d, *J* = 9.4 Hz, 1H); 5.89 (d, *J* = 9.4 Hz, 1H); 6.12 (s, 1H); 6.18 (s, 1H); 7.25 (d, *J* = 8.6 Hz, 2H); 7.44 (dd, *J*<sub>1</sub> = 8.2 Hz, *J*<sub>2</sub> = 7.8 Hz, 1H); 7.61 (d, *J* = 7.8 Hz, 1H); 7.65 (d, *J* = 8.6 Hz, 2H); 7.89 (s, 1H); 8.05 (d, *J* = 8.2 Hz, 1H). HPLC: Whelk-O1 column; λ = 254 nm; eluent: hexane/isopropanol = 80/20; Flow rate: 0.7 mL/min; *t*<sub>minor</sub> = 32.0 min, *t*<sub>major</sub> = 36.0 min.

**3-((4-bromophenyl)(tosylamino)methyl)but-3-en-2-one (3b).**  $^1\text{H NMR}$  (400 MHz,  $\text{CDCl}_3$ )  $\delta$  2.15 (s, 3H); 2.41 (s, 3H); 5.19 (d,  $J = 9.1$  Hz, 1H); 5.71 (d,  $J = 9.1$  Hz, 1H); 6.06 (s, 1H); 6.09 (s, 1H); 6.96 (d,  $J = 8.1$  Hz, 2H); 7.25 (d,  $J = 8.1$  Hz, 2H); 7.25 (d,  $J = 8.6$  Hz, 2H); 7.60 (d,  $J = 8.0$  Hz, 2H). HPLC: AD column;  $\lambda = 254$  nm; eluent: hexane/isopropanol = 80/20; Flow rate: 0.7 mL/min;  $t_{\text{minor}} = 23.1$  min,  $t_{\text{major}} = 27.5$  min.

**3-((4-chlorophenyl)(tosylamino)methyl)but-3-en-2-one (3c).**  $^1\text{H NMR}$  (400 MHz,  $\text{CDCl}_3$ )  $\delta$  2.15 (s, 3H); 2.40 (s, 3H); 5.21 (d,  $J = 8.6$  Hz, 1H); 5.78 (d,  $J = 8.6$  Hz, 1H); 6.03 (s, 1H); 6.05 (s, 1H); 7.03 (d,  $J = 8.3$  Hz, 2H); 7.15 (d,  $J = 8.3$  Hz, 2H); 7.25 (d,  $J = 8.2$  Hz, 2H); 7.62 (d,  $J = 8.2$  Hz, 2H). HPLC: AD column;  $\lambda = 254$  nm; eluent: hexane/isopropanol = 80/20; Flow rate: 0.3 mL/min;  $t_{\text{minor}} = 43.5$  min,  $t_{\text{major}} = 48.0$  min.

**3-((2-chlorophenyl)(tosylamino)methyl)but-3-en-2-one (3d).**  $^1\text{H NMR}$  (400 MHz,  $\text{CDCl}_3$ )  $\delta$  2.21 (s, 3H); 2.37 (s, 3H); 5.69 (d,  $J = 8.0$  Hz, 1H); 5.90 (d,  $J = 8.0$  Hz, 1H); 6.16 (s, 1H); 6.17 (s, 1H); 7.06-7.15 (m, 2H); 7.20 (d,  $J = 8.4$  Hz, 2H); 7.21-7.24 (m, 1H); 7.30-7.33 (m, 1H); 7.63 (d,  $J = 8.4$  Hz, 2H). HPLC: AD column;  $\lambda = 254$  nm; eluent: hexane/isopropanol = 80/20; Flow rate: 0.7 mL/min;  $t_{\text{minor}} = 22.1$  min,  $t_{\text{major}} = 24.5$  min.

**3-((4-fluorophenyl)(tosylamino)methyl)but-3-en-2-one (3e).**  $^1\text{H NMR}$  (400 MHz,  $\text{CDCl}_3$ )  $\delta$  2.15 (s, 3H); 2.41 (s, 3H); 5.23 (d,  $J = 8.7$  Hz, 1H); 5.73 (d,  $J = 8.7$  Hz, 1H); 6.06 (s, 1H); 6.09 (s, 1H); 6.89 (d,  $J = 8.6$  Hz, 2H); 7.05 (d,  $J = 8.6$  Hz, 2H); 7.24 (d,  $J = 8.3$  Hz, 2H); 7.63 (d,  $J = 8.3$  Hz, 2H). HPLC: AD column;  $\lambda = 254$  nm; eluent: hexane/isopropanol = 80/20; Flow rate: 0.7 mL/min;  $t_{\text{minor}} = 15.5$  min,  $t_{\text{major}} = 16.5$  min.

**3-((4-nitrophenyl)(tosylamino)methyl)but-3-en-2-one (3f).**  $^1\text{H NMR}$  (400 MHz,  $\text{CDCl}_3$ )  $\delta$  2.15 (s, 3H); 2.44 (s, 3H); 5.29 (d,  $J = 9.4$  Hz, 1H); 5.90 (d,  $J = 9.4$  Hz, 1H); 6.07 (s, 1H); 6.13 (s, 1H); 7.25 (d,  $J = 8.5$  Hz, 2H); 7.33 (d,  $J = 8.8$  Hz, 2H); 7.64 (d,  $J = 8.5$  Hz, 2H); 8.06 (d,  $J = 8.8$  Hz, 2H). HPLC: AD column;  $\lambda = 254$  nm; eluent: hexane/isopropanol = 80/20; Flow rate: 0.5 mL/min;  $t_{\text{minor}} = 53.0$  min,  $t_{\text{major}} = 68.0$  min.

**3-((2-nitrophenyl)(tosylamino)methyl)but-3-en-2-one (3g).**  $^1\text{H NMR}$  (400 MHz,  $\text{CDCl}_3$ )  $\delta$  2.04 (s, 3H); 2.46 (s, 3H); 5.03 (d,  $J = 9.8$  Hz, 1H); 6.08 (s, 1H); 6.26 (s, 1H); 6.93 (m, 2H); 7.15 (m, 3H); 7.37 (d,  $J = 8.0$  Hz, 2H); 7.73 (d,  $J = 9.2$  Hz, 2H). HPLC: AD column;  $\lambda = 254$  nm; eluent: hexane/isopropanol = 80/20; Flow rate: 0.7 mL/min;  $t_{\text{minor}} = 35.3$  min,  $t_{\text{major}} = 37.6$  min.

**3-(p-tolyl(tosylamino)methyl)but-3-en-2-one (3h).**  $^1\text{H NMR}$  (400 MHz,  $\text{CDCl}_3$ )  $\delta$  2.16 (s, 3H); 2.27 (s, 3H); 2.42 (s, 3H); 5.23 (d,  $J = 8.4$  Hz, 1H); 5.56 (d,  $J = 8.4$  Hz, 1H); 6.10 (s, 2H); 6.95 (d,  $J = 8.2$  Hz, 2H); 7.00 (d,  $J = 8.2$  Hz, 2H); 7.24 (d,  $J = 8.2$  Hz, 2H); 7.65 (d,  $J = 8.2$  Hz, 2H). HPLC: AD column;  $\lambda = 254$  nm; eluent: hexane/isopropanol = 80/20; Flow rate: 0.7 mL/min;  $t_{\text{minor}} = 16.0$  min,  $t_{\text{major}} = 18.0$  min.

**3-((2-methoxyphenyl)(tosylamino)methyl)but-3-en-2-one (3i).**  $^1\text{H NMR}$  (400 MHz,  $\text{CDCl}_3$ )  $\delta$  2.16 (s, 3H); 2.33 (s, 3H); 3.64 (s, 3H); 5.59 (d,  $J = 9.4$  Hz, 1H); 5.95 (d,  $J = 9.4$  Hz, 1H); 6.07 (s, 1H); 6.11 (s, 1H); 6.66 (d,  $J = 8.0$  Hz, 1H); 6.72 (dd,  $J_1 = 8.0$  Hz,  $J_2 = 8.0$  Hz, 1H); 7.21 (m, 4H); 7.57 (d,  $J = 8.4$  Hz, 2H). HPLC: (*S,S*)-Whelk-O1 column;  $\lambda = 254$  nm; eluent: hexane/isopropanol = 80/20; flow rate: 0.7 mL/min;  $t_{\text{minor}} = 50.0$  min,  $t_{\text{major}} = 53.0$  min.

**3-((3-methoxyphenyl)(tosylamino)methyl)but-3-en-2-one (3j).**  $^1\text{H NMR}$  (400 MHz,  $\text{CDCl}_3$ )  $\delta$  2.15 (s, 3H); 2.39 (s, 3H); 3.67 (s, 3H); 5.24 (d,  $J = 8.8$  Hz, 1H); 5.74 (d,  $J = 8.8$  Hz, 1H); 6.07 (s, 1H); 6.08 (s, 1H); 6.60 (s, 1H); 6.64 (d,  $J = 8.0$  Hz, 1H); 6.69 (d,  $J = 8.0$  Hz, 1H); 7.09 (dd,  $J_1 = 8.0$  Hz,  $J_2 = 8.0$  Hz, 1H); 7.21 (d,  $J = 8.4$  Hz, 2H); 7.63 (d,  $J = 8.4$  Hz, 2H). HPLC: AD column;  $\lambda = 254$  nm; eluent: hexane/isopropanol = 80/20; Flow rate: 0.7 mL/min;  $t_{\text{minor}} = 23.2$  min,  $t_{\text{major}} = 25.8$  min.

**3-(hydroxy(4-nitrophenyl)methyl)but-3-en-2-one (6a).**  $^1\text{H NMR}$  (400 MHz,  $\text{CDCl}_3$ )  $\delta$  2.34 (s, 3H); 5.67 (s, 1H); 6.03 (s, 1H); 6.25 (s, 1H); 7.54 (d,  $J = 8.6$  Hz, 2H); 8.17 (d,  $J = 8.6$  Hz, 2H). HPLC: AD column;  $\lambda = 254$  nm; eluent: hexane/isopropanol = 80/20; Flow rate: 0.5 mL/min;  $t_{\text{minor}} = 47.1$  min,  $t_{\text{major}} = 58.5$  min.

**Phenyl 2-((4-methylphenylsulfonamido)(4-nitrophenyl)methyl)acrylate (6b).**  $^1\text{H NMR}$  (400 MHz,  $\text{CDCl}_3$ )  $\delta$  2.42 (s, 3H); 5.48 (d,  $J = 9.0$  Hz, 1H); 5.87 (d,  $J = 9.0$  Hz, 1H); 6.06 (s, 1H); 6.53 (s, 1H); 6.88 (m, 2H); 7.23-7.37 (m, 5H); 7.43 (d,  $J = 8.7$  Hz, 2H); 7.70 (d,  $J = 8.7$  Hz, 2H); 8.12 (m, 2H). HPLC: AD column;  $\lambda = 254$  nm; eluent: hexane/isopropanol = 80/20; Flow rate: 0.7 mL/min;  $t_{\text{minor}} = 30.3$  min,  $t_{\text{major}} = 35.2$  min.

**Phenyl 2-((4-bromophenyl)(4-methylphenylsulfonamido)methyl)acrylate (6c).**  $^1\text{H}$  NMR (400 MHz,  $\text{CDCl}_3$ )  $\delta$  2.42 (s, 3H); 5.35 (d,  $J = 8.8$  Hz, 1H); 5.59 (d,  $J = 8.8$  Hz, 1H); 6.04 (s, 1H); 6.50 (s, 1H); 6.87 (m, 2H); 7.06 (m, 2H); 7.22-7.26 (m, 3H); 7.31-7.39 (m, 4H); 7.68 (m, 2H). HPLC: AD column;  $\lambda = 254$  nm; eluent: hexane/isopropanol = 80/20; Flow rate: 0.7 mL/min;  $t_{\text{minor}} = 17.9$  min,  $t_{\text{major}} = 20.1$  min.

**Phenyl 2-((4-chlorophenyl)(4-methylphenylsulfonamido)methyl)acrylate (6d).**  $^1\text{H}$  NMR (400 MHz,  $\text{CDCl}_3$ )  $\delta$  2.44 (s, 3H); 5.38 (d,  $J = 8.8$  Hz, 1H); 5.64 (d,  $J = 8.8$  Hz, 1H); 6.05 (s, 1H); 6.50 (s, 1H); 6.88 (m, 2H); 7.14 (m, 2H); 7.20-7.28 (m, 5H); 7.33-7.38 (m, 2H); 7.70 (m, 2H). HPLC: AD column;  $\lambda = 254$  nm; eluent: hexane/isopropanol = 80/20; Flow rate: 0.7 mL/min;  $t_{\text{minor}} = 16.8$  min,  $t_{\text{major}} = 19.7$  min.
